# Supplementary material for: Metagenomics analysis of bacteriophages and antimicrobial resistance from global urban sewage
Source: PubMed Central journal article supplement (PMC7810828; doi:10.1038/s41598-021-80990-6), 2021-01-15
Supplement: 41598_2021_80990_MOESM1_ESM.pdf [file 41598_2021_80990_MOESM1_ESM.pdf]

# Metagenomics analysis of bacteriophages and antimicrobial resistance from global urban sewage

Josephine E.S. Strange<sup>1</sup>, Pimlapas Leekitcharoenphon<sup>1\*</sup>, Frederik Duus Møller<sup>1</sup>, Frank M. Aarestrup<sup>1</sup>

<sup>1</sup>National Food Institute, Technical University of Denmark, WHO Collaborating Center for Antimicrobial Resistance in Food borne Pathogens and Genomics, European Union Reference Laboratory for Antimicrobial Resistance, Kgs. Lyngby, Denmark.

**Supplementary Table 1**  
**Coverage and depth of coverage distributions**

|                          |                  | <b>NCBI phages</b> | <b>IMG/VR genome</b>  | <b>Huge phages</b>    |
|--------------------------|------------------|--------------------|-----------------------|-----------------------|
| <b>Coverage (%)</b>      | <b>Mean (SD)</b> | 1.21 (4.96)        | 2.5 (7.78)            | 2.09 (8.09)           |
|                          | <b>Min;Max</b>   | 0;96.08            | 0;97.62               | 0;97.25               |
| <b>Depth of coverage</b> | <b>Mean (SD)</b> | 0.03 (0.34)        | 0.07 (0.72)           | 0.18 (2.83)           |
|                          | <b>Min;Max</b>   | 0;33.28            | 0;190.27 <sup>1</sup> | 0;176.58 <sup>2</sup> |

<sup>1</sup>The phage from IMG/VR genome having a depth of 190.27 is X3300014750\_\_\_\_Ga0134554\_100011 with a sequence length of 103,348 bp. The phage was found in various datasets with coverages ranging between 3.35% to 93.55%

<sup>2</sup>The phage from custom huge phages having a depth of 176.58 is F27\_PHAGE\_CIR\_34\_39 with a sequence length of 200,395 bp. The phage was found in various datasets with coverages ranging between 0% to 59.14%.

## Supplementary Table 2

### Number of samples and phages within each region

|                          | <b>Total</b> | <b>AF</b>        | <b>AS</b>        | <b>EU</b>        | <b>ME</b>        | <b>NA</b>        | <b>OC</b>       | <b>SA</b>        |
|--------------------------|--------------|------------------|------------------|------------------|------------------|------------------|-----------------|------------------|
| <b>Number of samples</b> | 78           | 12               | 10               | 31               | 3                | 14               | 3               | 5                |
| <b>Number of phages</b>  |              |                  |                  |                  |                  |                  |                 |                  |
| <b>NCBI</b>              | 638          | 447<br>(70.1%)   | 454<br>(71.2%)   | 373<br>(58.5%)   | 178<br>(27.9%)   | 313<br>(49.1%)   | 129<br>(20.2%)  | 382<br>(59.9%)   |
| <b>IMG/VR all</b>        | 54893        | 21392<br>(39.0%) | 19794<br>(36.1%) | 32157<br>(58.6%) | 10461<br>(19.1%) | 26354<br>(48.0%) | 8847<br>(16.1%) | 15834<br>(28.8%) |
| <b>IMG/VR genomes</b>    | 3699         | 2287<br>(61.8%)  | 2182<br>(59.0%)  | 2767<br>(74.8%)  | 1281<br>(34.6%)  | 2436<br>(65.9%)  | 993<br>(26.8%)  | 1881<br>(50.9%)  |
| <b>Huge phages</b>       | 114          | 60<br>(52.6%)    | 81<br>(71.1%)    | 64<br>(56.1%)    | 32<br>(28.1%)    | 31<br>(27.2%)    | 13<br>(11.4%)   | 56<br>(49.1%)    |

AF, Africa; AS, Asia; EU, Europe; NA, North America; ME, Middle East, OC, Oceania; SA South America

### Supplementary Table 3

#### Distribution of countries within income classes

| Income class | AF | AS | EU | NA | ME | OC | SA | Total      |
|--------------|----|----|----|----|----|----|----|------------|
| High         | 0  | 1  | 23 | 14 | 0  | 3  | 0  | 41 (52.6%) |
| Middle       | 8  | 8  | 8  | 0  | 3  | 0  | 5  | 32 (41.0%) |
| Low          | 4  | 1  | 0  | 0  | 0  | 0  | 0  | 5 (6.4%)   |

For classification of countries please refer to Supplementary Table 1. Percentages are given as the percent of total samples.  
AF, Africa; AS, Asia; EU, Europe; NA, North America; ME, Middle East; OC, Oceania; SA, South America

## Supplementary Table 4

### Summary of pooled datapoints within phage families and clades

| Database           | Order/Clade           | Family                    | Number of datapoints (phages) |
|--------------------|-----------------------|---------------------------|-------------------------------|
| NCBI virus         | <i>Caudovirales</i>   | <i>Siphoviridae</i>       | 262                           |
|                    | <i>Caudovirales</i>   | <i>Myoviridae</i>         | 173                           |
|                    | <i>Caudovirales</i>   | <i>Autographiviridae</i>  | 74                            |
|                    | <i>Caudovirales</i>   | <i>Podoviridae</i>        | 66                            |
|                    | <i>Caudovirales</i>   | <i>Drexlerviridae</i>     | 17                            |
|                    | <i>Tubulavirales</i>  | <i>Inoviridae</i>         | 11                            |
|                    | <i>Petitvirales</i>   | <i>Microviridae</i>       | 10                            |
|                    | <i>Caudovirales</i>   | <i>Demerecviridae</i>     | 10                            |
|                    | <i>Caudovirales</i>   | <i>Herelleviridae</i>     | 6                             |
|                    | <i>Caudovirales</i>   | <i>Ackermannviridae</i>   | 5                             |
|                    | Unclassified          | Unclassified <sup>†</sup> | 2                             |
| Unclassified       | <i>Plasmaviridae</i>  | 1                         |                               |
|                    | <i>Kalamavirales</i>  | <i>Tectiviridae</i>       | 1                             |
| Custom huge phages | Unknown               |                           | 80                            |
|                    | Mahaphage             |                           | 9                             |
|                    | Kabirphage            |                           | 6                             |
|                    | Close to Whopperphage |                           | 6                             |
|                    | Whopperphage          |                           | 5                             |
|                    | Jabbarphage           |                           | 4                             |
|                    | Kaempephage           |                           | 2                             |
|                    | Distinct group        |                           | 2                             |
|                    | Enormephage           |                           | 1                             |

<sup>†</sup>The two unclassified phages were that of Enterobacteria phage P4 (NC\_001609) and Hydrogenobaculum phage strain HP1 (NC\_028651)

**Supplementary Table 5**  
**Procrustes correlation**

|                                 | <b>Correlation coefficient</b> | <b>p-value</b> |
|---------------------------------|--------------------------------|----------------|
| NCBI phages & bacteria          | 0.8148                         | 0.001          |
| IMG/VR phages & bacteria        | 0.8956                         | 0.001          |
| Custom huge phages & bacteria   | 0.7054                         | 0.001          |
| Bacteria & ARGs                 | 0.8813                         | 0.001          |
| NCBI phages & ARGs              | 0.8488                         | 0.001          |
| IMG/VR phages & ARGs            | 0.8956                         | 0.001          |
| Custom huge phages & ARGs       | 0.7379                         | 0.001          |
| NCBI other viruses & bacteria   | 0.7167                         | 0.001          |
| NCBI other viruses & ARGs       | 0.7619                         | 0.001          |
| IMG/VR other viruses & bacteria | 0.8896                         | 0.001          |
| IMG/VR other viruses & ARGs     | 0.9033                         | 0.001          |

## Supplementary Table 6

### Overview of sample annotations and temperatures at day of sample collection

| Sample    | Sample accession | Country       | City        | Region | Income class | Collection date | Temperature (°C) |           |         |
|-----------|------------------|---------------|-------------|--------|--------------|-----------------|------------------|-----------|---------|
|           |                  |               |             |        |              |                 | Sample           | Transport | Storage |
| ALB-17    | SAMEA4527599     | Albania       | Tirana      | EU     | Upper middle | 02 January      | 12               | 12        | -73     |
| AUS-18    | SAMEA4527600     | Australia     | Woden       | OC     | High         | 02 April        | 19.3             | 4         | -80     |
| AUS-18a   | SAMEA4527601     | Australia     | Melbourne   | OC     | High         | 02 August       | 23.8             | 4         | -80     |
| AUT-70    | SAMEA4527602     | Austria       | Vienna      | EU     | High         | 16 February     | 7                | 18        | -80     |
| BGR-66    | SAMEA4527603     | Bulgaria      | Sofia       | EU     | Upper middle | 15 February     | 5                | 4         | -70     |
| BRA-53    | SAMEA4527604     | Brazil        | Belém       | SA     | Upper middle | 16 February     | NR               | 4         | -70     |
| BRA-53a   | SAMEA4527605     | Brazil        | Belém       | SA     | Upper middle | 15 February     | 28               | 4         | -80     |
| BWA-19    | SAMEA4527606     | Botswana      | Palapye     | AF     | Upper middle | 25 January      | 32               | 4         | -80     |
| CAN-22    | SAMEA4527607     | Canada        | Regina      | NA     | High         | 26 January      | -5.6             | 4         | -80     |
| CAN-22a   | SAMEA4527608     | Canada        | Calgary     | NA     | High         | 02 January      | -4               | 4         | -80     |
| CAN-22b   | SAMEA4527609     | Canada        | Toronto     | NA     | High         | 02 January      | 4                | 4         | -80     |
| CAN-22c   | SAMEA4527610     | Canada        | Ottawa      | NA     | High         | 26 January      | -0.7             | 4         | -80     |
| CHE-67    | SAMEA4527611     | Switzerland   | Liebefeld   | EU     | High         | 27 January      | 3.8              | -20       | -70     |
| CHN-64    | SAMEA4527612     | China         | Guangzhou   | AS     | Upper middle | 28 January      | 13               | 13        | -70     |
| CIV-13    | SAMEA4527613     | Côte d'Ivoire | Abidjan     | AF     | Lower middle | 25 January      | NR               | 5         | -80     |
| CZE-23    | SAMEA4527615     | Czechia       | Brno        | EU     | High         | 02 January      | 11               | 9         | -75     |
| DEU-27    | SAMEA4527616     | Germany       | Berlin      | EU     | High         | 02 August       | NR               | NR        | -80     |
| DNK-71-RA | SAMEA4527617     | Denmark       | Avedøre     | EU     | High         | 03 February     | 4                | -20       | 10      |
| DNK-71-RD | SAMEA4527618     | Denmark       | Damhusåen   | EU     | High         | 03 February     | 4                | -20       | 10      |
| DNK-71-RL | SAMEA4527619     | Denmark       | Lynetten    | EU     | High         | 03 February     | 4                | -20       | 10      |
| ECU-14    | SAMEA4527620     | Ecuador       | Quito       | SA     | Upper middle | 02 January      | 24               | 15        | -80     |
| ECU-14a   | SAMEA4527621     | Ecuador       | Galápagos   | SA     | Upper middle | 02 June         | 28               | 28        | -80     |
| ESP-75    | SAMEA4527622     | Spain         | Barcelona   | EU     | High         | 02 October      | 14.5             | 10        | -75     |
| ETH-24    | SAMEA4527623     | Ethiopia      | Addis Ababa | AF     | Low          | 02 January      | 27               | 4         | -80     |
| FIN-25    | SAMEA4527624     | Finland       | Helsinki    | EU     | High         | 26 January      | -1               | 6         | -80     |
| GEO-59    | SAMEA4527625     | Georgia       | Tbilisi     | EU     | Lower middle | 25 January      | 1                | 4         | -80     |

| Sample | Sample accession | Country     | City         | Region | Income class | Collection date | Temperature (°C) |           |         |
|--------|------------------|-------------|--------------|--------|--------------|-----------------|------------------|-----------|---------|
|        |                  |             |              |        |              |                 | Sample           | Transport | Storage |
| GHA-4  | SAMEA4527626     | Ghana       | Tamale       | AF     | Lower middle | 30 January      | 30               | 4         | -20     |
| HRV-68 | SAMEA4527628     | Croatia     | Zagreb       | EU     | Upper Middle | 02 January      | 14               | 42        | -82     |
| HUN-61 | SAMEA4527629     | Hungary     | Budapest     | EU     | High         | 02 February     | 11               | 10        | -80     |
| IND-11 | SAMEA4527630     | India       | Cochin       | AS     | Lower middle | 27 January      | 32               | 15        | -80     |
| IRL-69 | SAMEA4527631     | Ireland     | Dublin       | EU     | High         | 02 October      | 8                | 4         | -80     |
| IRN-12 | SAMEA4527632     | Iran        | Tehran       | ME     | Upper middle | 02 February     | 11               | 4         | -80     |
| ISL-28 | SAMEA4527633     | Iceland     | Reykjavik    | EU     | High         | 02 February     | -3               | 4         | -77     |
| ISR-29 | SAMEA4527634     | Israel      | Jerusalem    | ME     | High         | 31 January      | 3                | 4         | -80     |
| ITA-30 | SAMEA4527635     | Italy       | Rome         | EU     | High         | 02 February     | 13               | 4         | -80     |
| KAZ-6  | SAMEA4527636     | Kazakhstan  | Almaty       | AS     | Upper middle | 02 February     | 5                | 10        | -80     |
| KEN-72 | SAMEA4527637     | Kenya       | Thika        | AF     | Lower middle | 02 August       | 25               | 10        | -80     |
| KHM-21 | SAMEA4527638     | Cambodia    | Phnom Penh   | AS     | Lower middle | 02 May          | 34               | 34        | -80     |
| LKA-40 | SAMEA4527639     | Sri Lanka   | Colombo      | AS     | Lower middle | 28 February     | 31               | 30        | -80     |
| LUX-32 | SAMEA4527640     | Luxembourg  | Belvaux      | EU     | High         | 02 January      | 9                | 6         | -80     |
| LVA-31 | SAMEA4527641     | Latvia      | Riga         | EU     | High         | 02 January      | 3                | 4         | -80     |
| MDA-65 | SAMEA4527642     | Moldova     | Chişinău     | EU     | Lower middle | 04 February     | NR               | NR        | NR      |
| MKD-62 | SAMEA4527643     | Macedonia   | Skopje       | EU     | Upper middle | 02 February     | 19               | 4         | -80     |
| MLT-63 | SAMEA4527644     | Malta       | Saint Venera | EU     | High         | 02 January      | 17               | 10        | -80     |
| MYS-54 | SAMEA4527645     | Malaysia    | Kuala Lumpur | AS     | Upper middle | 02 April        | 29               | 4         | -80     |
| NGA-50 | SAMEA4527646     | Nigeria     | Lagos        | AF     | Lower middle | 02 February     | NR               | 4         | -80     |
| NLD-43 | SAMEA4527647     | Netherlands | Bilthoven    | EU     | High         | 27 January      | 11               | 5         | -50     |
| NOR-34 | SAMEA4527648     | Norway      | Oslo         | EU     | High         | 02 March        | 1                | 4         | -70     |
| NPL-33 | SAMEA4527649     | Nepal       | Kathmandu    | AS     | Low          | 30 January      | 26               | 26        | -80     |
| NZL-56 | SAMEA4527650     | New Zealand | Dunedin      | OC     | High         | 27 January      | 14               | 4         | -80     |
| PAK-7  | SAMEA4527652     | Pakistan    | Karachi      | AS     | Lower middle | 27 January      | 24               | 25        | -80     |
| PER-35 | SAMEA4527653     | Peru        | Lima         | SA     | Upper middle | 02 April        | 29               | 4         | -80     |
| POL-36 | SAMEA4527651     | Poland      | Puławy       | EU     | High         | 02 February     | 8                | 4         | -80     |
| SEN-8  | SAMEA4527654     | Senegal     | Dakar        | AF     | Low          | 02 February     | NR               | 7         | -80     |
| SGP-52 | SAMEA4527655     | Singapore   | Singapore    | AS     | High         | 02 March        | 31               | 30        | -80     |
| SRB-37 | SAMEA4527656     | Serbia      | Belgrade     | EU     | Upper middle | 27 January      | 10               | 4         | -80     |
| SVK-9  | SAMEA4527657     | Slovakia    | Bratislava   | EU     | High         | 02 February     | 10               | 10        | -80     |
| SVN-38 | SAMEA4527658     | Slovenia    | Ljubljana    | EU     | High         | 25 January      | 0                | 6         | -70     |



| Sample  | Sample accession | Country         | City         | Region | Income class | Collection date | Temperature (°C) |           |         |
|---------|------------------|-----------------|--------------|--------|--------------|-----------------|------------------|-----------|---------|
|         |                  |                 |              |        |              |                 | Sample           | Transport | Storage |
| SWE-41  | SAMEA4527659     | Sweden          | Uppsala      | EU     | High         | 02 February     | 5                | 5         | -75     |
| SWE-41a | SAMEA4527660     | Sweden          | Gothenburg   | EU     | High         | 02 November     | 3                | 15        | -76     |
| TGO-44  | SAMEA4527662     | Togo            | Lomé         | AF     | Low          | 26 January      | 30               | 30        | -80     |
| TUR-46  | SAMEA4527663     | Turkey          | Ankara       | ME     | Upper middle | 29 January      | 12               | 6.1       | -83     |
| TZA-15  | SAMEA4527664     | Tanzania        | Moshi        | AF     | Low          | 02 March        | 27               | 23        | -80     |
| USA-74  | SAMEA4527665     | USA, Georgia    | Atlanta      | NA     | High         | 02 February     | 24.4             | 4         | -25     |
| USA-74a | SAMEA4527666     | USA, Washington | Seattle      | NA     | High         | 02 January      | 7.8              | 4         | -80     |
| USA-74b | SAMEA4527667     | USA, Illinois   | Chicago      | NA     | High         | 24 February     | 3.9              | 5         | -80     |
| USA-74c | SAMEA4527668     | USA, Texas      | El Paso      | NA     | High         | 23 February     | 16.1             | 4         | 6       |
| USA-74d | SAMEA4527669     | USA, Oregon     | Portland     | NA     | High         | 02 October      | 15.5             | NR        | 4       |
| USA-74e | SAMEA4527670     | USA, Texas      | El Paso      | NA     | High         | 22 February     | 16.1             | 4         | 6       |
| USA-74f | SAMEA4527671     | USA, Texas      | El Paso      | NA     | High         | 22 February     | 16.1             | 4         | 6       |
| USA-74g | SAMEA4527672     | USA, Texas      | El Paso      | NA     | High         | 23 February     | 16.1             | 4         | 6       |
| USA-74h | SAMEA4527673     | USA, Colorado   | Adams County | NA     | High         | NR              | NR               | NR        | NR      |
| USA-74i | SAMEA4527674     | USA, Colorado   | Boulder      | NA     | High         | 28 March        | 13.9             | 4         | 4       |
| VNM-48  | SAMEA4527675     | Vietnam         | Ho Chi Minh  | AS     | Lower middle | 27 January      | NR               | NR        | NR      |
| XK-60   | SAMEA4527676     | Kosovo          | Pristina     | EU     | Lower middle | 02 March        | 11               | 6         | -80     |
| ZAF-39  | SAMEA4527677     | South Africa    | Johannesburg | AF     | Upper middle | 02 April        | 30               | 4         | -70     |
| ZMB-49  | SAMEA4527678     | Zambia          | Lusaka       | AF     | Lower middle | 25 January      | 26.7             | 4         | 4       |
| ZMB-49b | SAMEA4527679     | Zambia          | Kitwe        | AF     | Lower middle | 01 December     | 27               | 4         | 4       |

Sample: Temperature of sample at time of sampling.

NR: Not reported; AF, Africa; AS, Asia; EU, Europe; ME, Middle East; NA, North America; OC, Oceania; SA, South America.

## Supplementary Table 7

### Phage family composition within the NCBI database<sup>†</sup>

| Order                | Family                   | Number of phage members |
|----------------------|--------------------------|-------------------------|
| <b>Caudovirales</b>  | <i>Ackermannviridae</i>  | 23                      |
|                      | <i>Autographiviridae</i> | 349                     |
|                      | <i>Chaseviridae</i>      | 7                       |
|                      | <i>Demerecviridae</i>    | 55                      |
|                      | <i>Drexlerviridae</i>    | 71                      |
|                      | <i>Myoviridae</i>        | 623                     |
|                      | <i>Podoviridae</i>       | 241                     |
|                      | <i>Siphoviridae</i>      | 1410                    |
|                      | <i>Herelleviridae</i>    | 120                     |
|                      | <i>Unclassified</i>      | 2                       |
| <b>Kalamavirales</b> | <i>Tectiviridae</i>      | 7                       |
| <b>Microvirales</b>  | <i>Microviridae</i>      | 61                      |
| <b>Tubulavirales</b> | <i>Inoviridae</i>        | 43                      |
| <b>Vinavirales</b>   | <i>Corticoviridae</i>    | 2                       |
| <b>Unclassified</b>  | <i>Plasmaviridae</i>     | 1                       |

<sup>†</sup>Numbers as of June 2020. As the NCBI database utilised for mapping within the study is from March 2019, the numbers are likely less than the ones reported here; it was not possible to obtain a data on the database composition.

## Supplementary Table 8

### Quantile breaks and their corresponding percentages

| <b>Database</b>       | <b>Quantile breaks</b> | <b>Colour representation<sup>†</sup></b> |
|-----------------------|------------------------|------------------------------------------|
| NCBI phages           | 200                    | 0.5%                                     |
| IMG/VR genomes        | 15                     | 6.7%                                     |
| Huge phages           | 30                     | 3.3%                                     |
| NCBI families         | 10                     | 10%                                      |
| Clades of huge phages | 30                     | 3.3%                                     |

<sup>†</sup>Percentage of datapoints in the distribution represented by a single colour, e.g. the top 0.5% of the datapoints for NCBI phages are represented by pale yellow.

## Supplementary Table 9

### Quantile breaks of NCBI bacterial genera

| <b>Database</b>       | <b>Quantile breaks</b> | <b>Colour representation<sup>†</sup></b> |
|-----------------------|------------------------|------------------------------------------|
| NCBI bacterial genera | 20                     | 5%                                       |

<sup>†</sup>Percentage of datapoints in the distribution represented by a single colour, e.g. top 5% of datapoints are represented by pale yellow.

**Coverage distribution of NCBI phages  
2016**

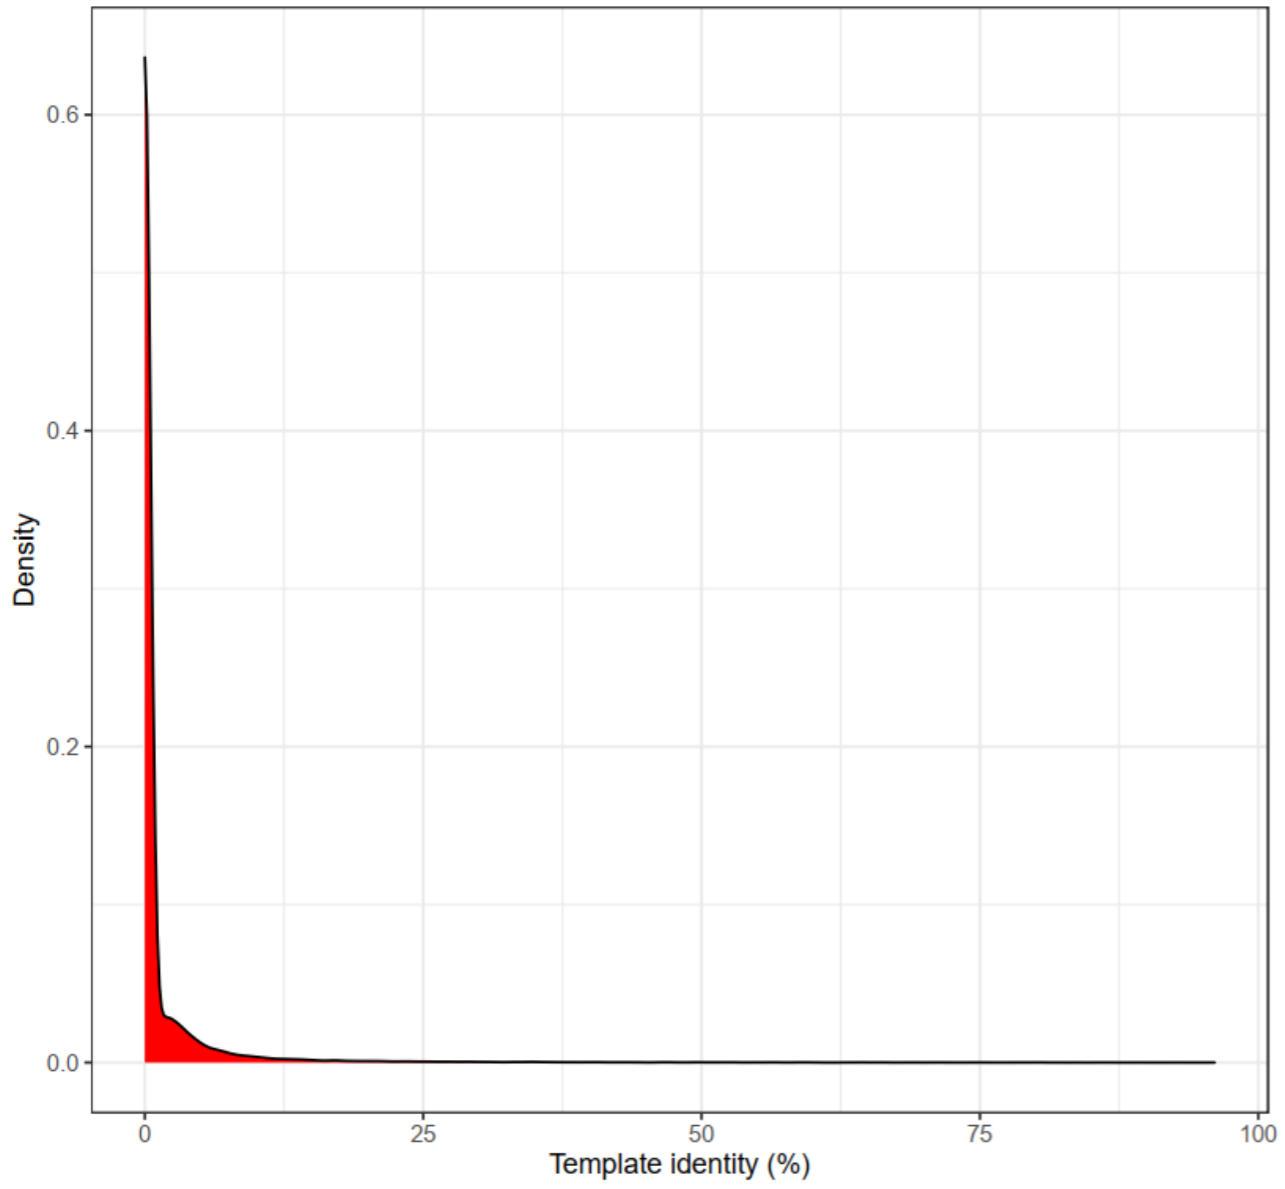

**Depth distribution of NCBI phages  
2016**

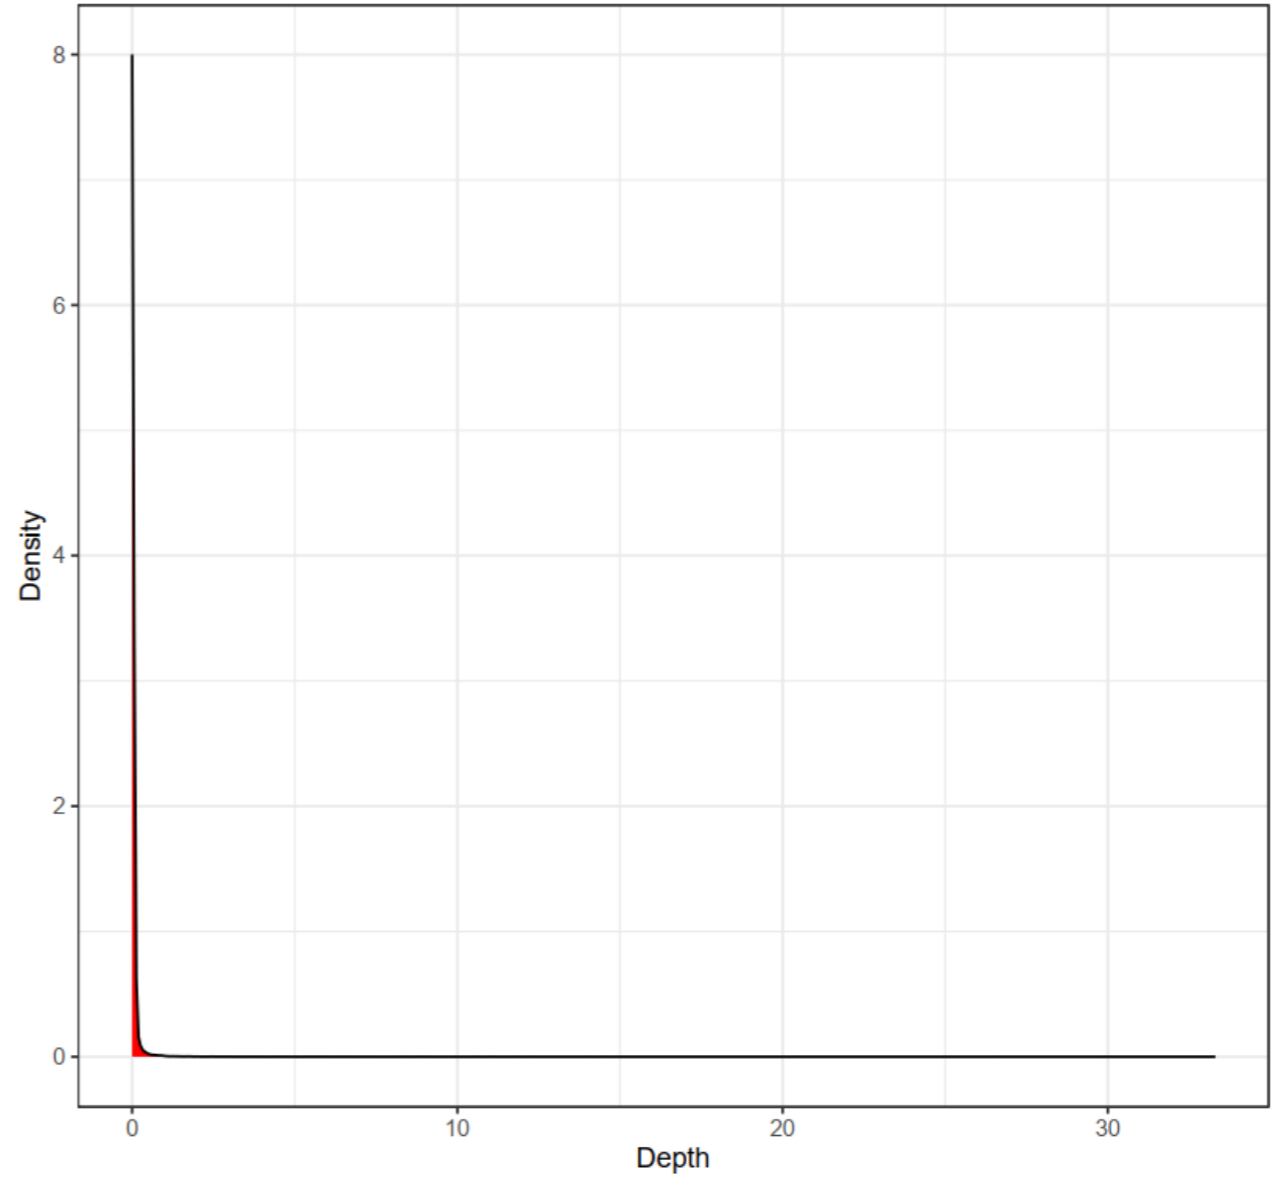

**Supplementary Figure 1 Coverage (left) and depth (right) distributions for NCBI phages**

**Coverage distribution of IMG/VR genomes  
2016**

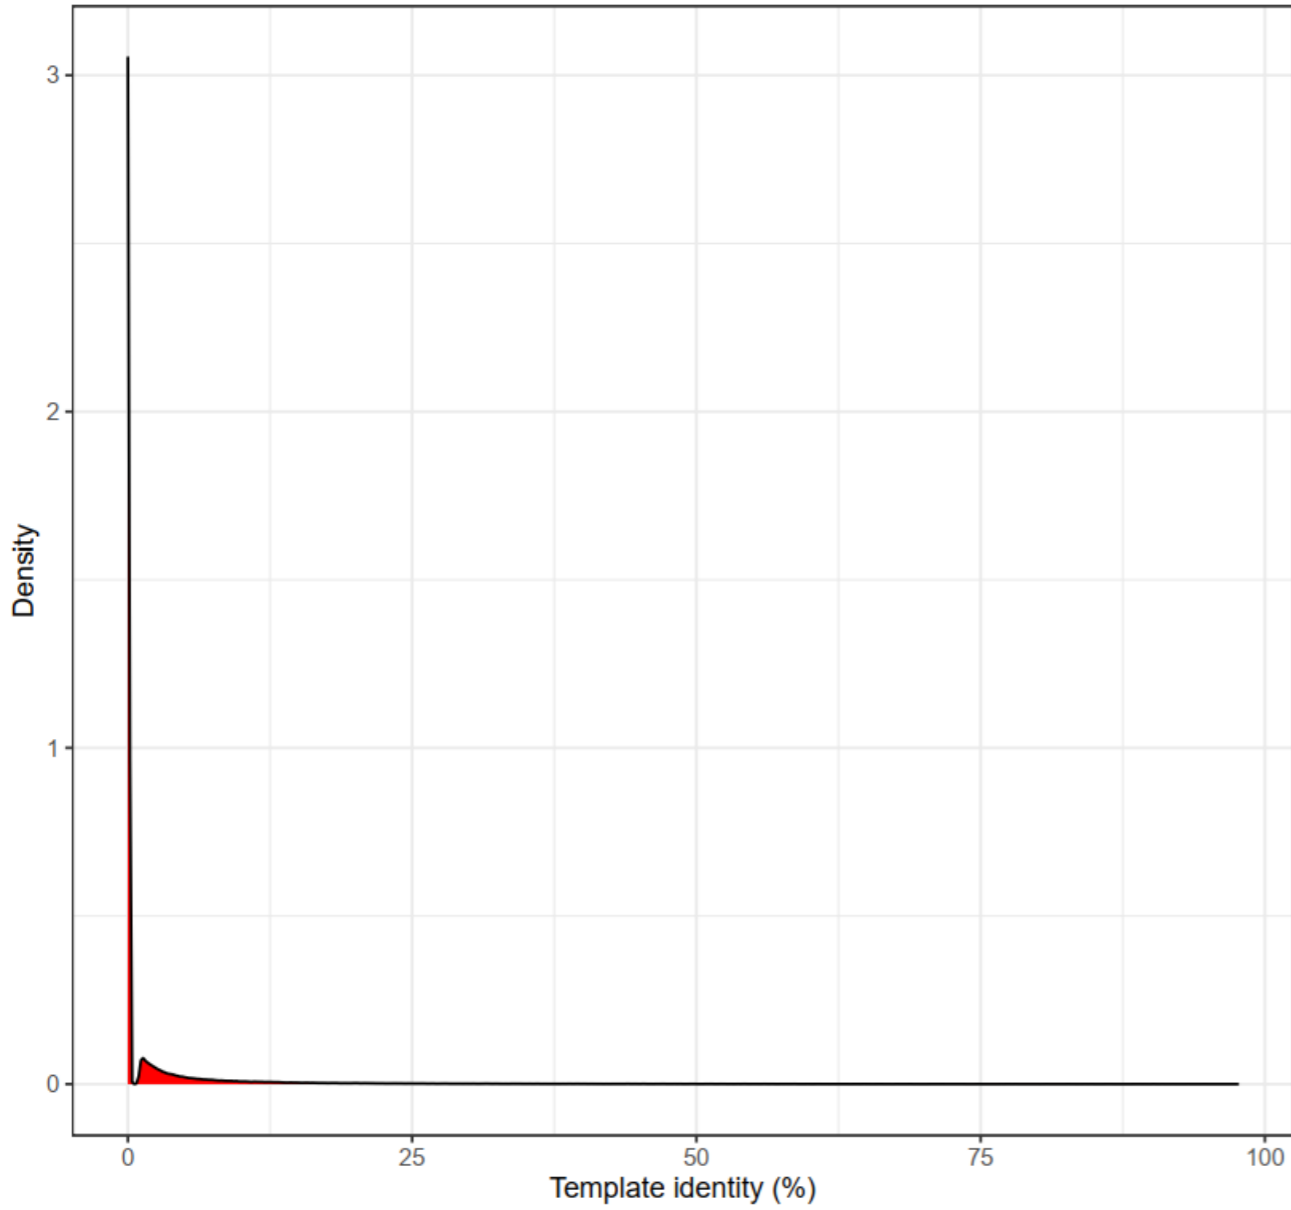

**Depth distribution of IMG/VR genomes  
2016**

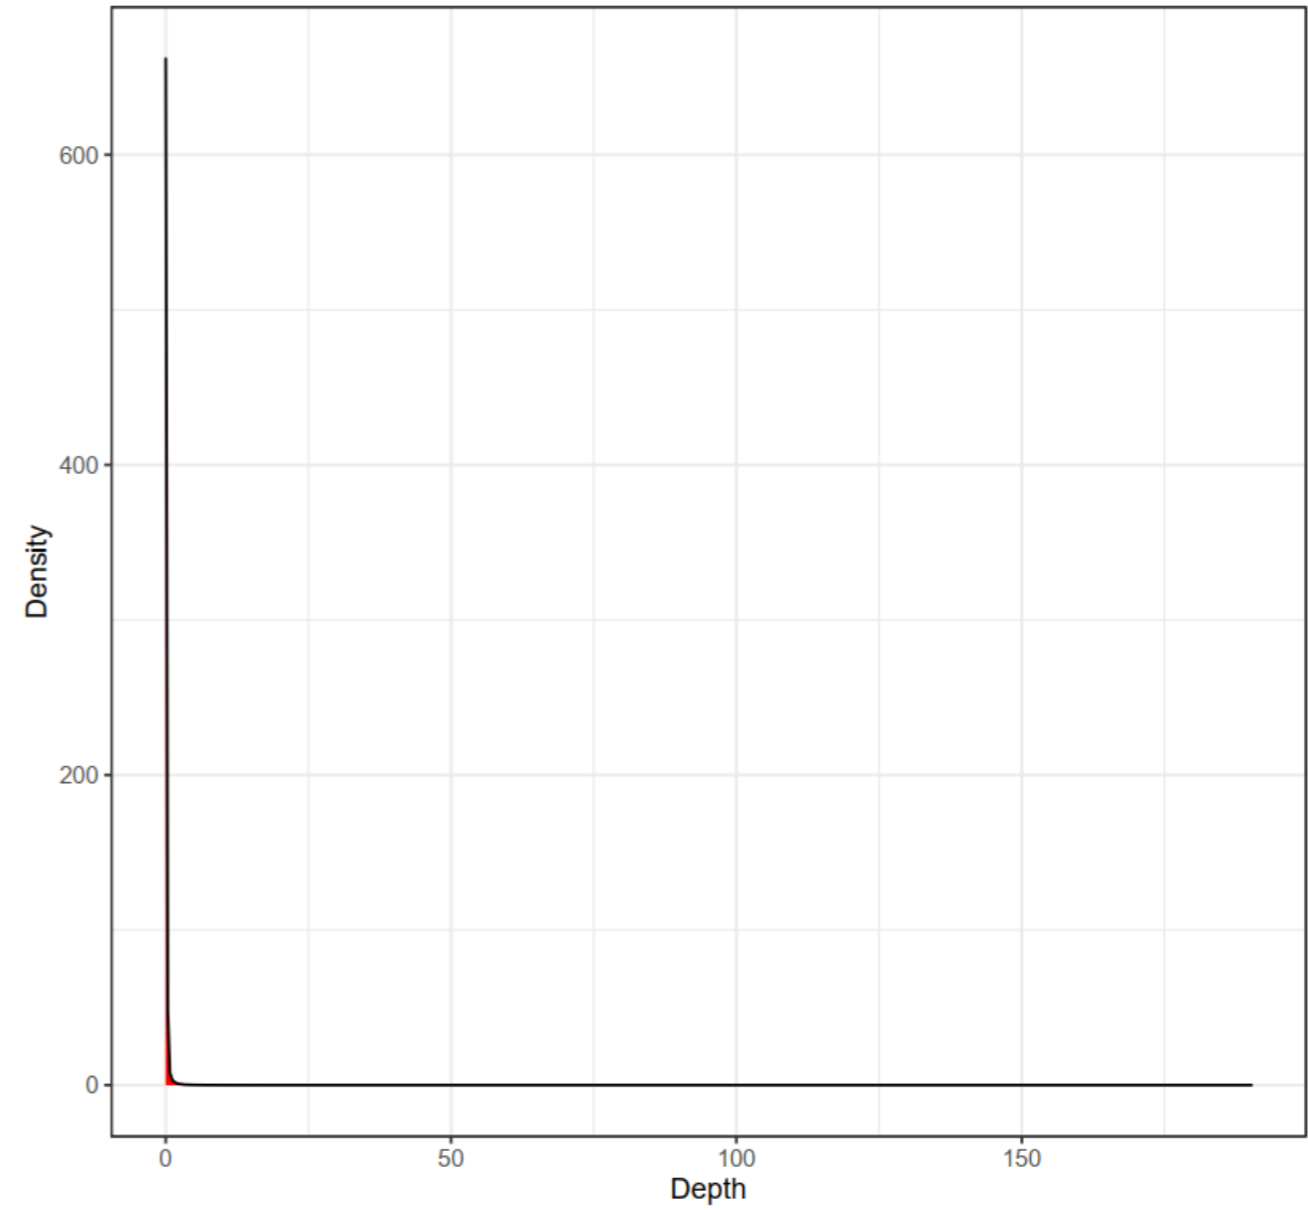

**Supplementary Figure 2 Coverage (left) and depth (right) distributions for IMG/VR genomes**

**Coverage distribution of huge phages  
2016**

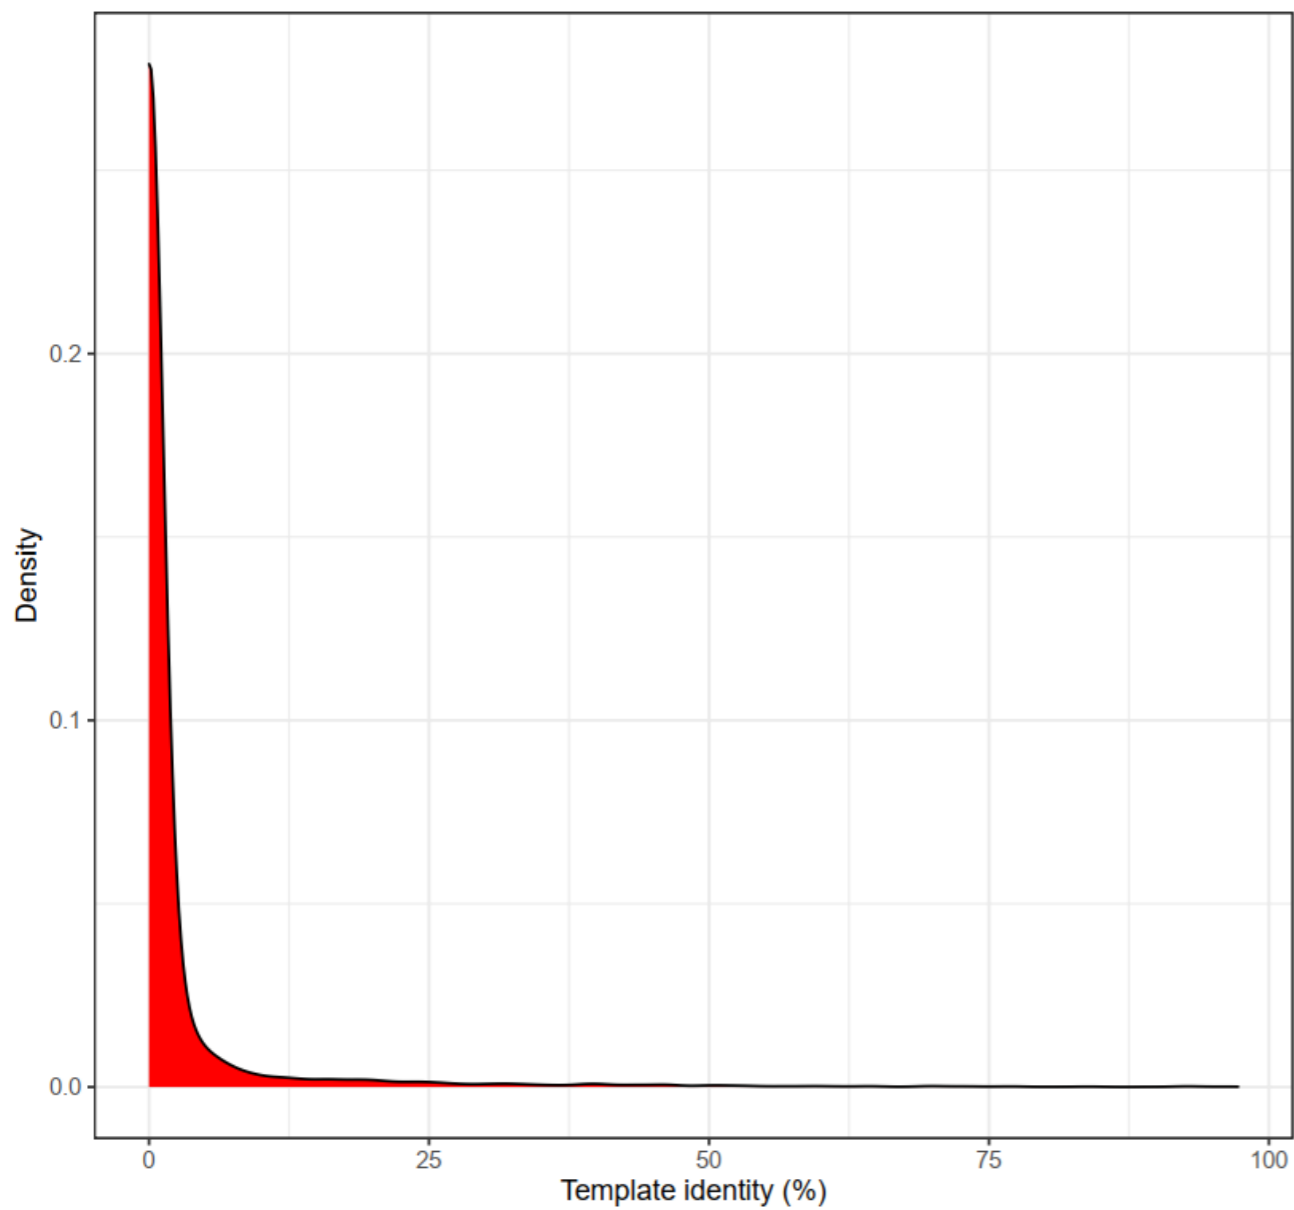

**Depth distribution of huge phages  
2016**

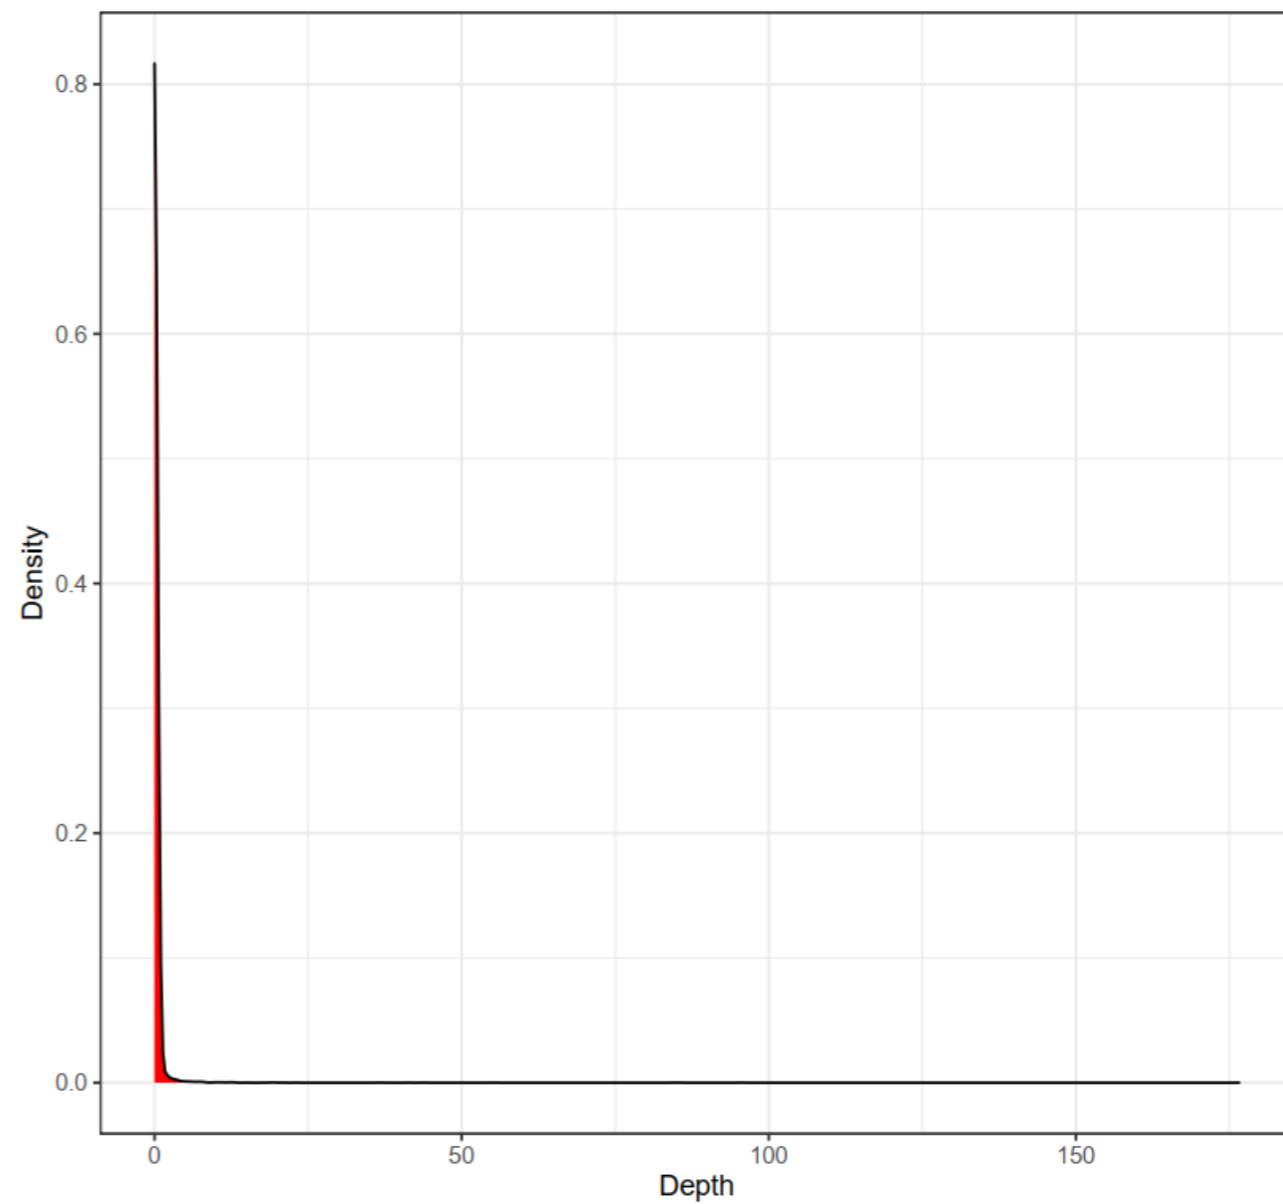

**Supplementary Figure 3 Coverage (left) and depth (right) distributions for huge phages.**

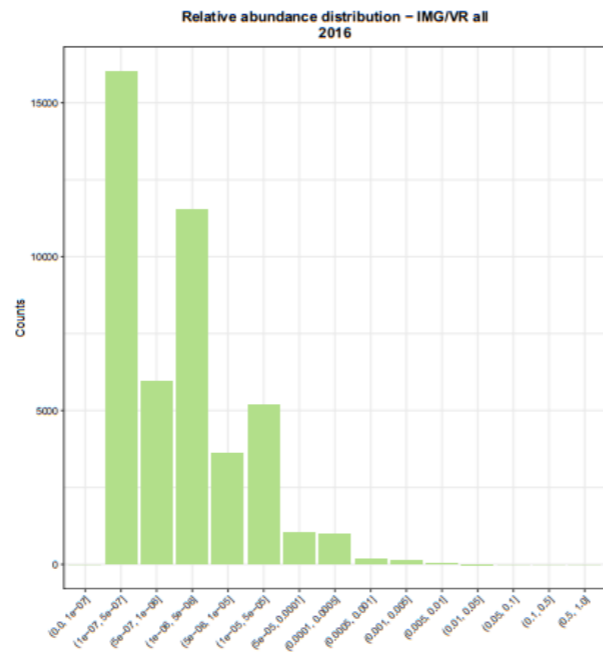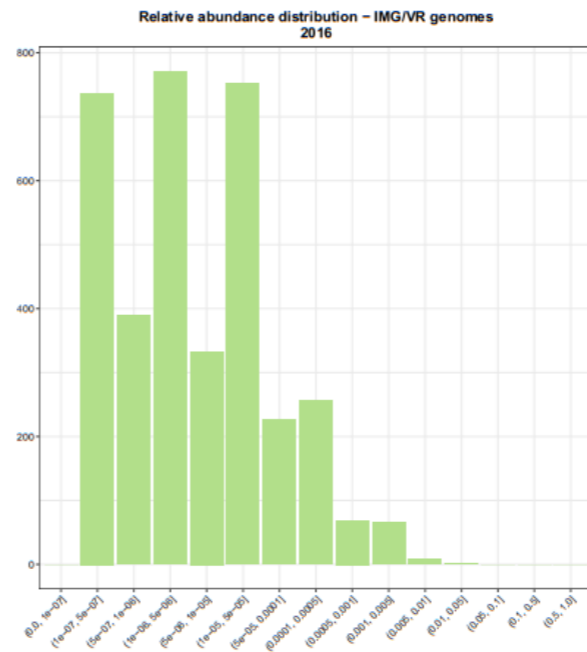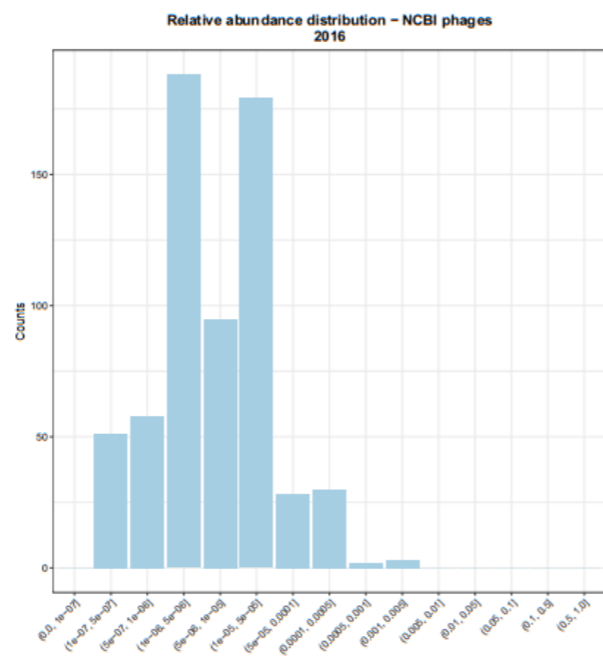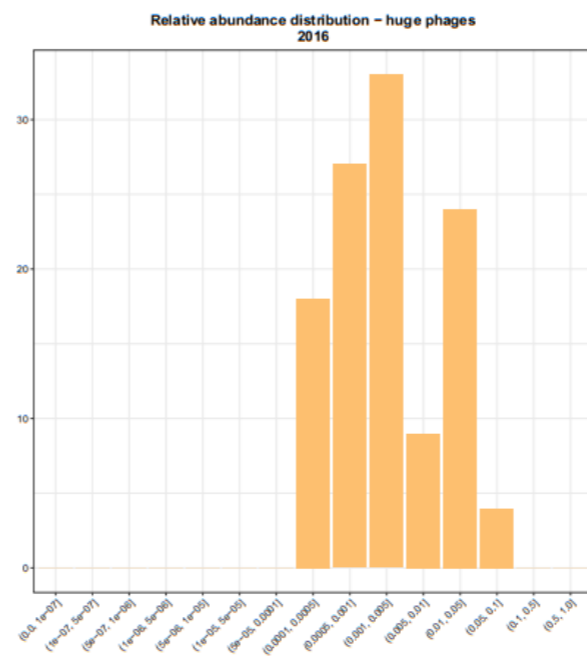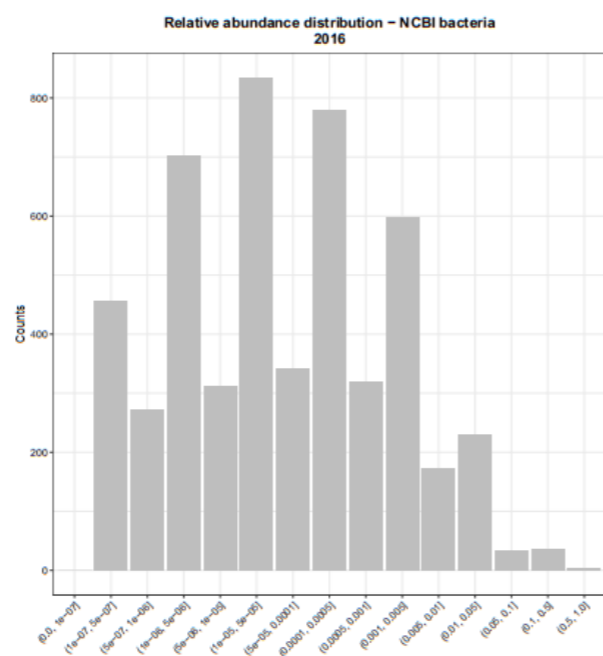

**Supplementary Figure 4 Relative abundance distribution of various databases;** Top left: IMG/VR all fragments; top right: IMG/VR genomes; middle left: NCBI phages; middle right: huge phages; bottom left: NCBI bacteria.



Fragment count summary – all  
2016

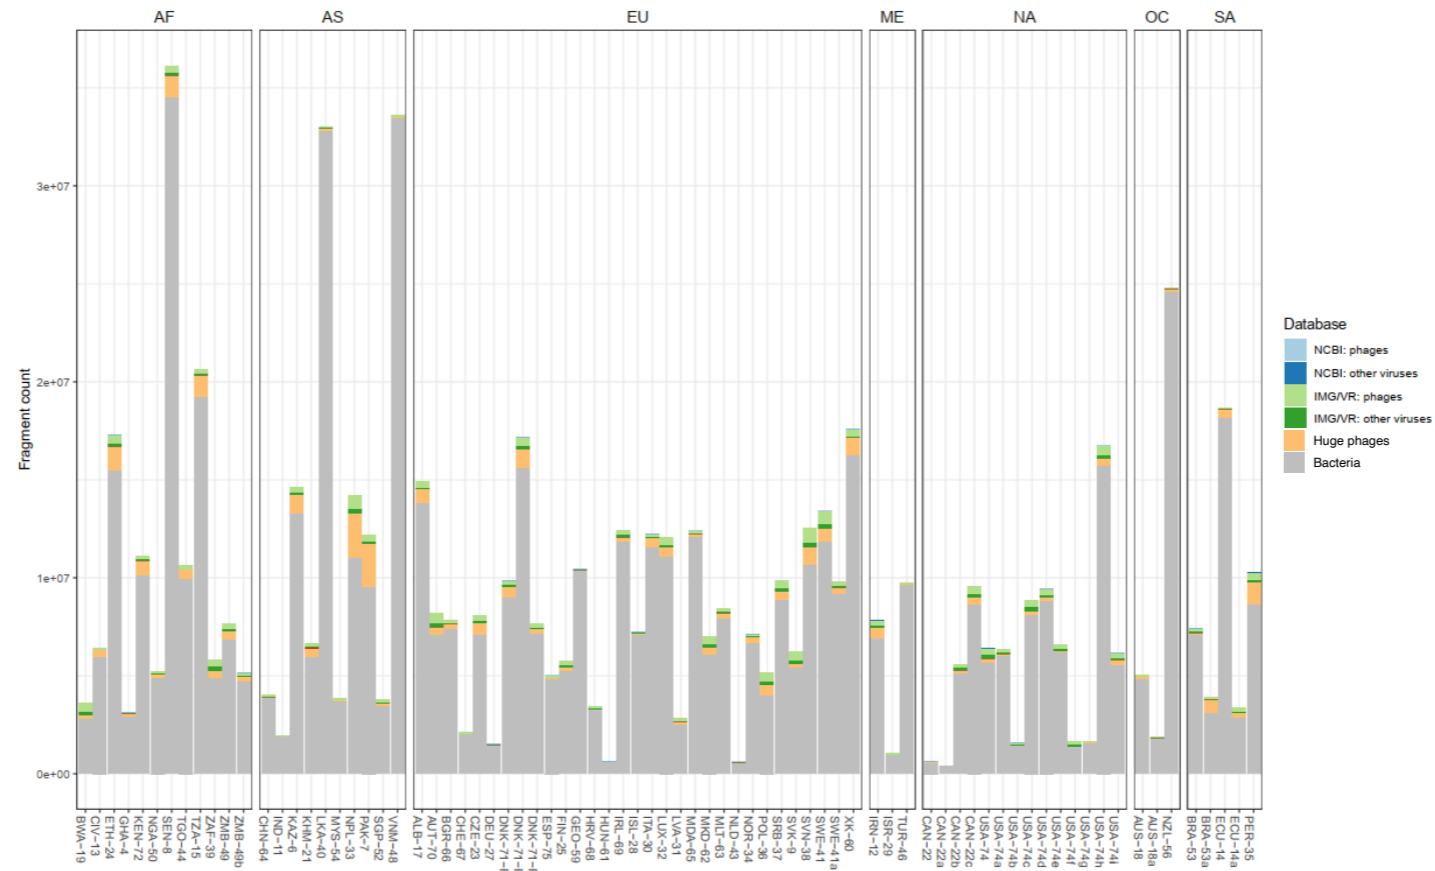

Relative abundance summary  
2016

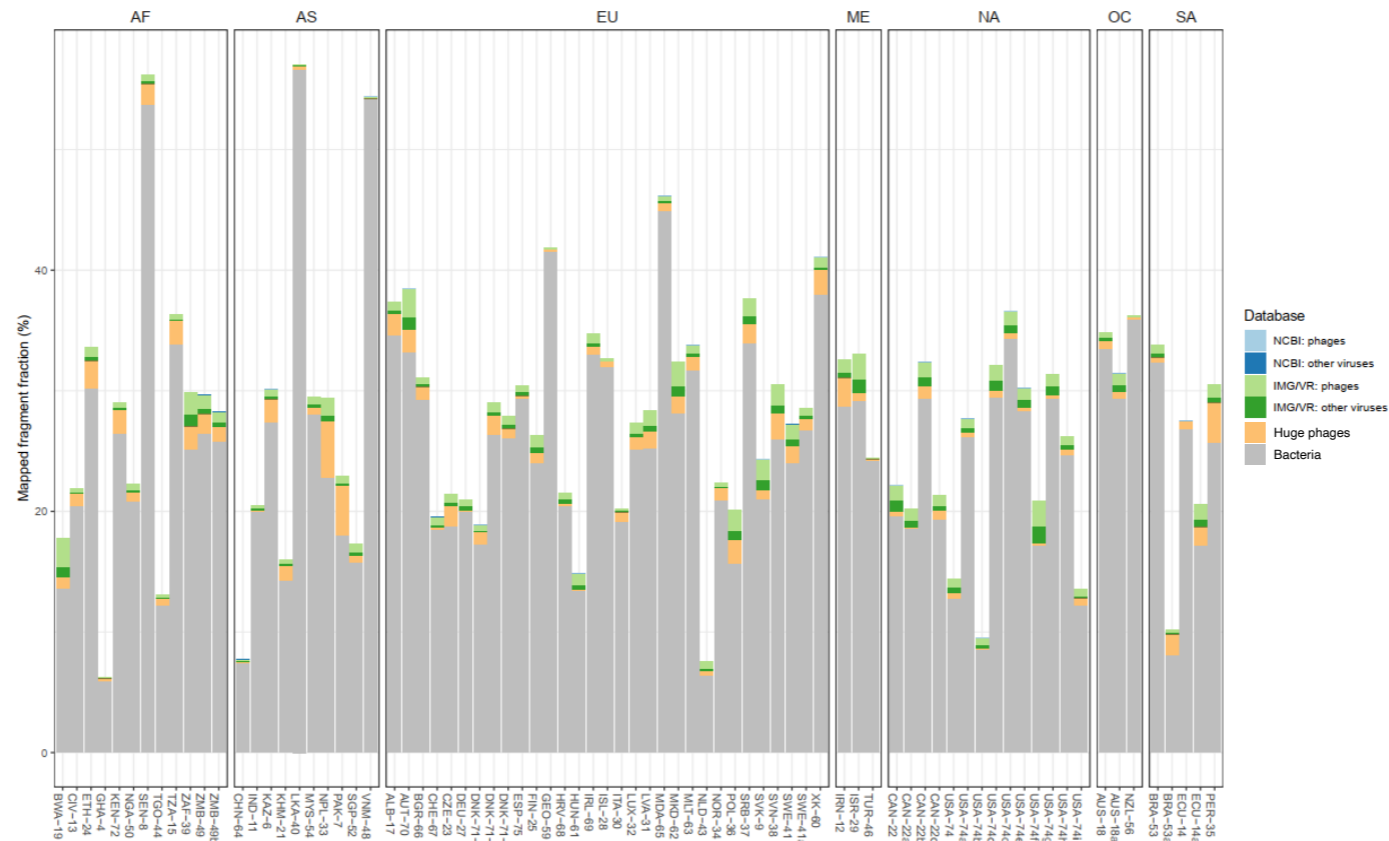

**Supplementary Figure 5** Fragment mapping summary (top) and relative abundance summary (bottom) to bacterial and viral databases. AF, Africa; AS, Asia; EU, Europe; ME, Middle East; NA, North America; OC, Oceania; SA, South America.

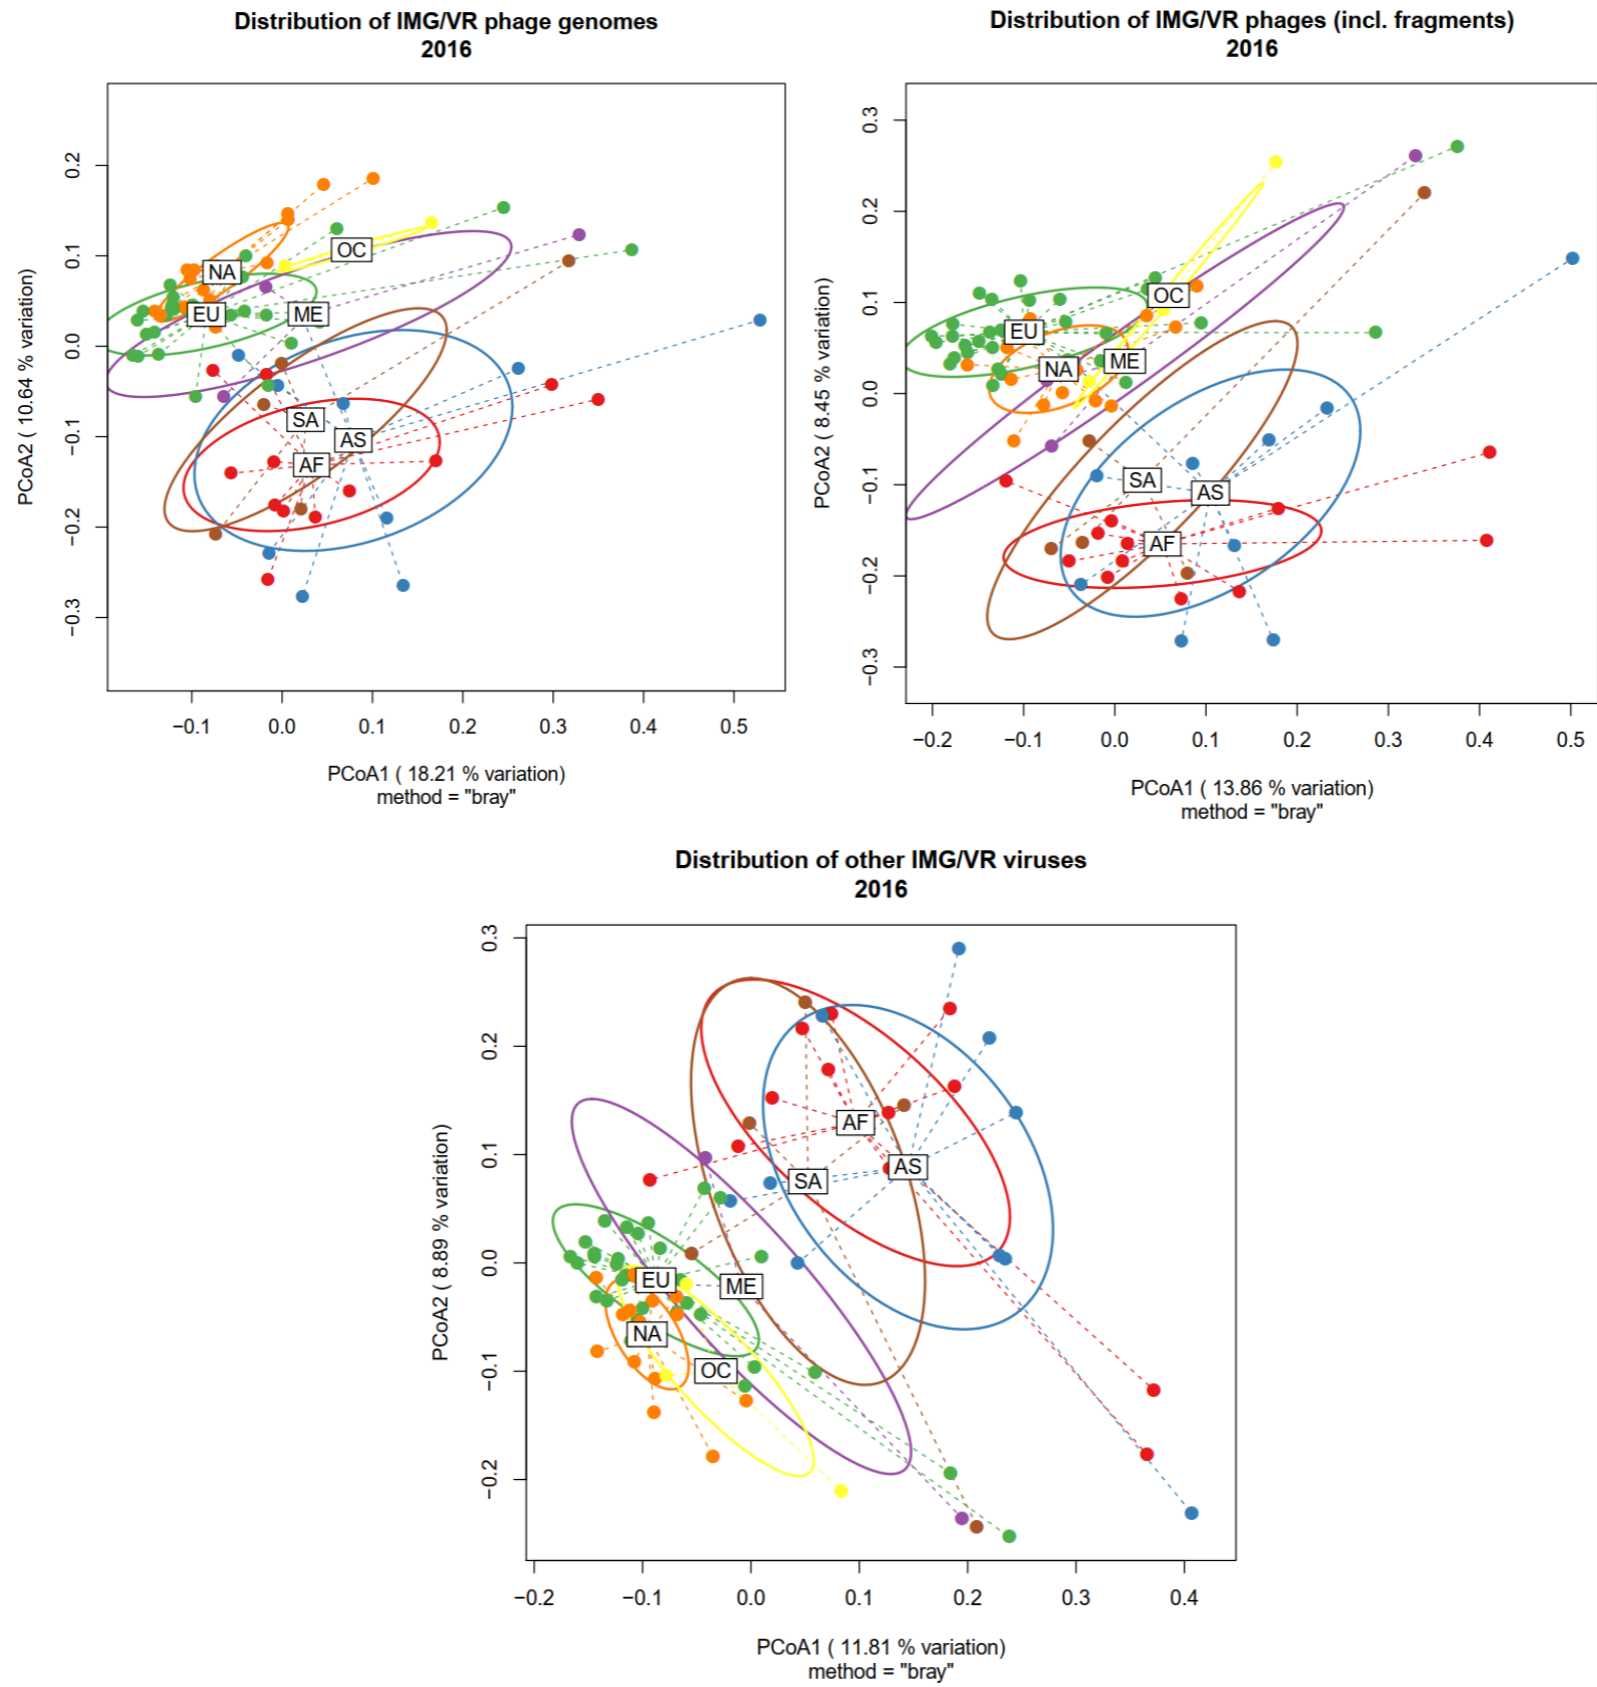

**Supplementary Figure 6 PCoA of IMG/VR genomes (top left), all phages (incl. fragments, top right), and other viruses (bottom).** Data stratified by region. Data is based on Bray-Curtis dissimilarities on Hellinger standardised relative abundances to account for phages of low-abundance. Variations are explained by X- and Y-axes (1<sup>st</sup> and 2<sup>nd</sup> coordinates).  
 AF, Africa; AS, Asia; EU, Europe; ME, Middle East; NA, North America; OC, Oceania; SA, South America.

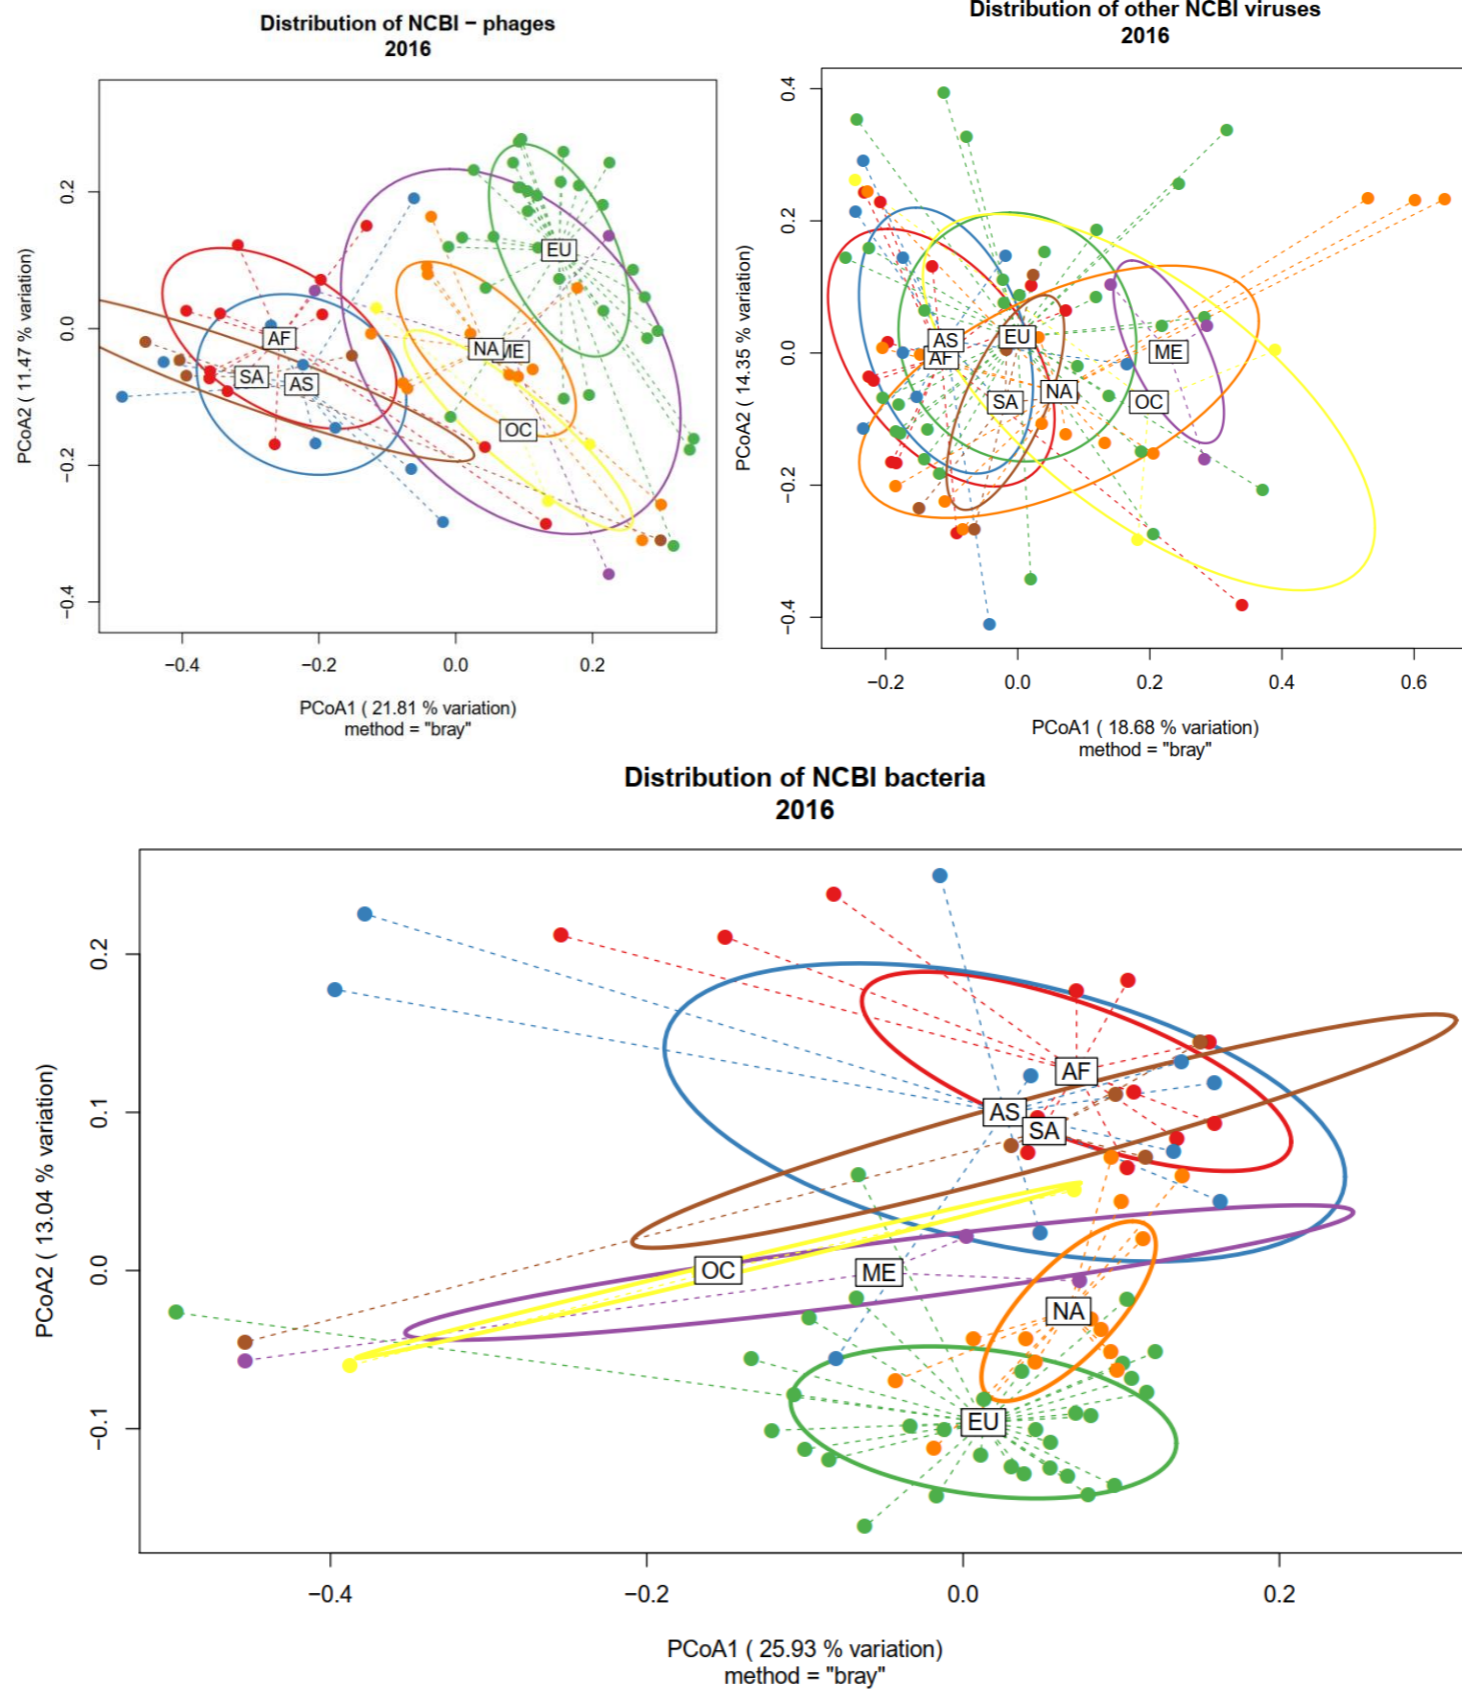

**Supplementary Figure 7 PCoA of NCBI phages (top left), other viruses (top right), and bacteria (bottom).**

Data stratified by region. Data is based on Bray-Curtis dissimilarities of Hellinger standardised relative abundances to account for phages of low-abundance. Variations are explained by X- and Y-axes (1<sup>st</sup> and 2<sup>nd</sup> coordinates).

AF, Africa; AS, Asia; EU, Europe; ME, Middle East; NA, North America; OC, Oceania; SA, South America.



**Supplementary Figure 8**  
**Relative abundances of**  
**top 15 NCBI phages per**  
**sample.**

204 total phages. Colour intensity based on 0.5%-quantiles (deciles). Columns grouped by Bray-Curtis dissimilarities of Hellinger standardised relative abundances. Rows hierarchically clustered by Pearson correlation.

AF, Africa; AS, Asia; EU, Europe; ME, Middle East; NA, North America; OC, Oceania; SA, South America.

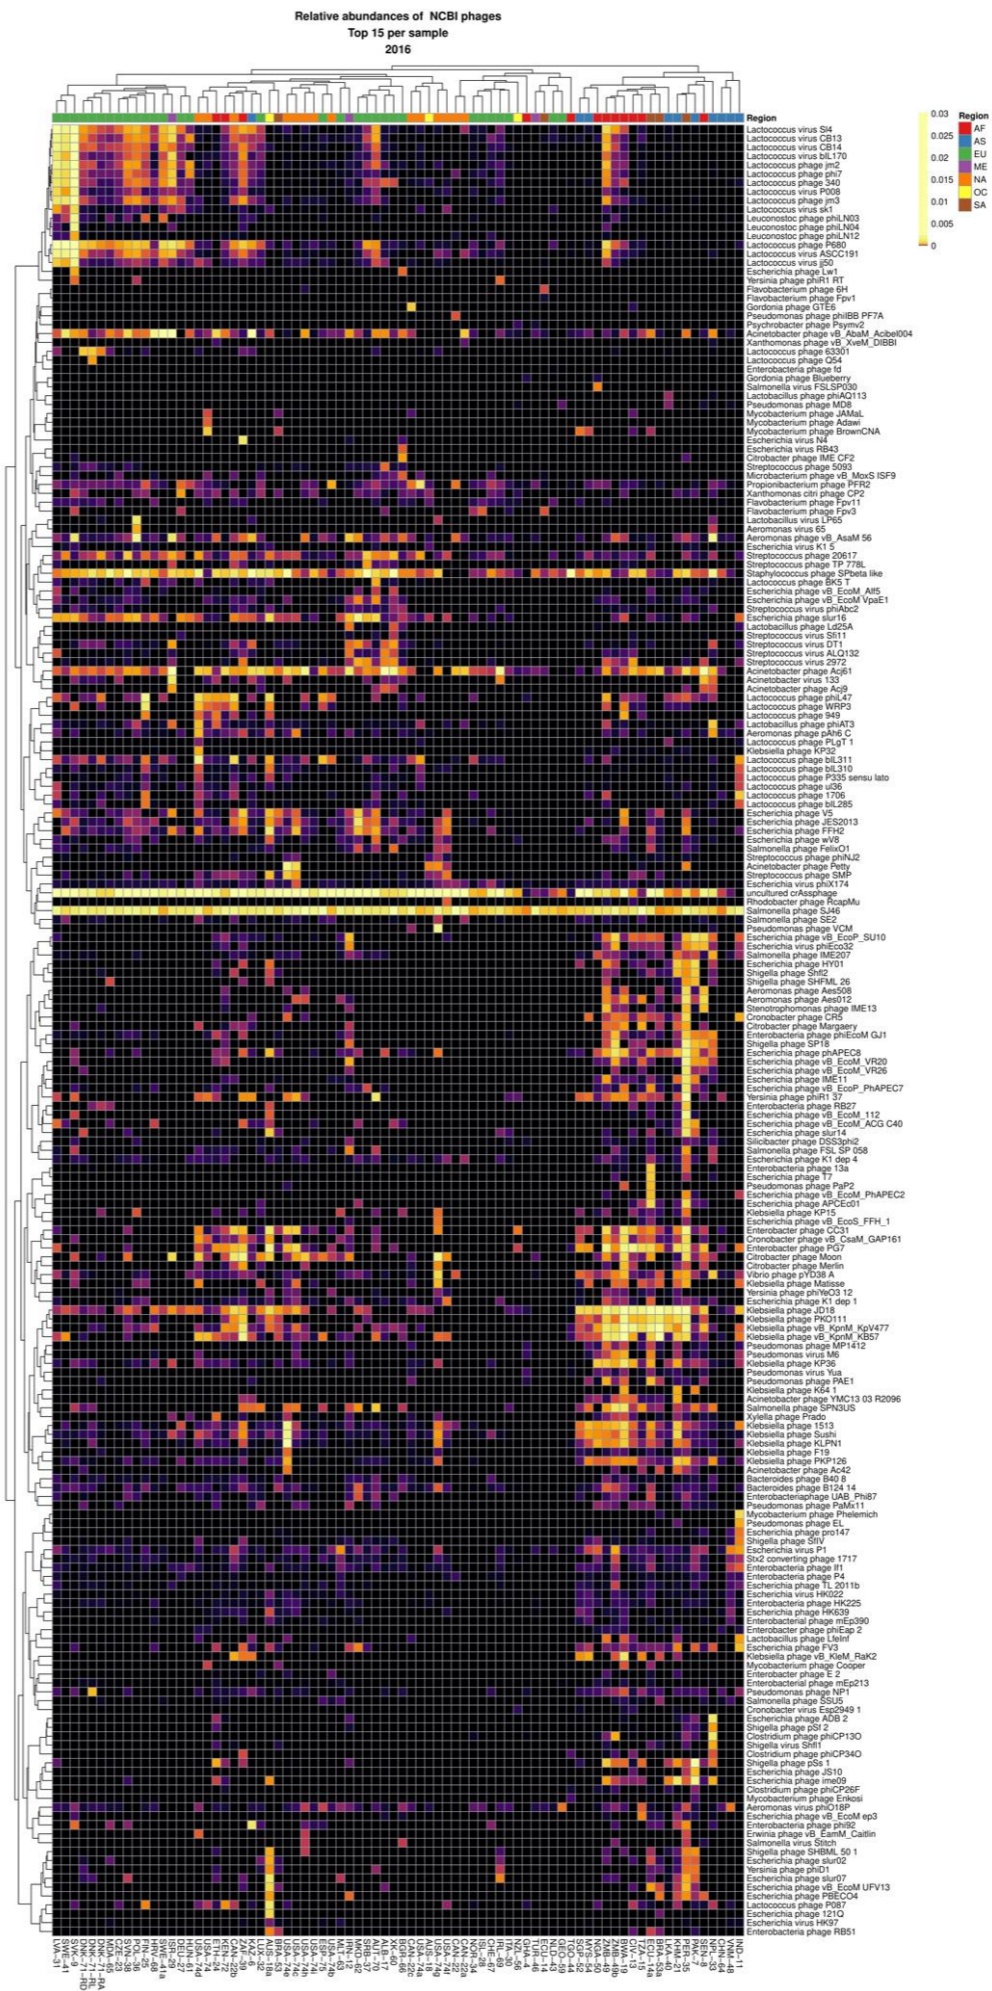



**Supplementary Figure 9 Relative abundances of top 15 IMG/VR genomes.**

173 total phages. Colour intensity based on 6.6%-quantiles. Columns clustered according to Bray-Curtis dissimilarities of Hellinger standardised relative abundances. Row hierarchically clustered according to their Pearson correlation.

AF, Africa; AS, Asia; EU, Europe; ME, Middle East; NA, North America; OC, Oceania; SA, South America.

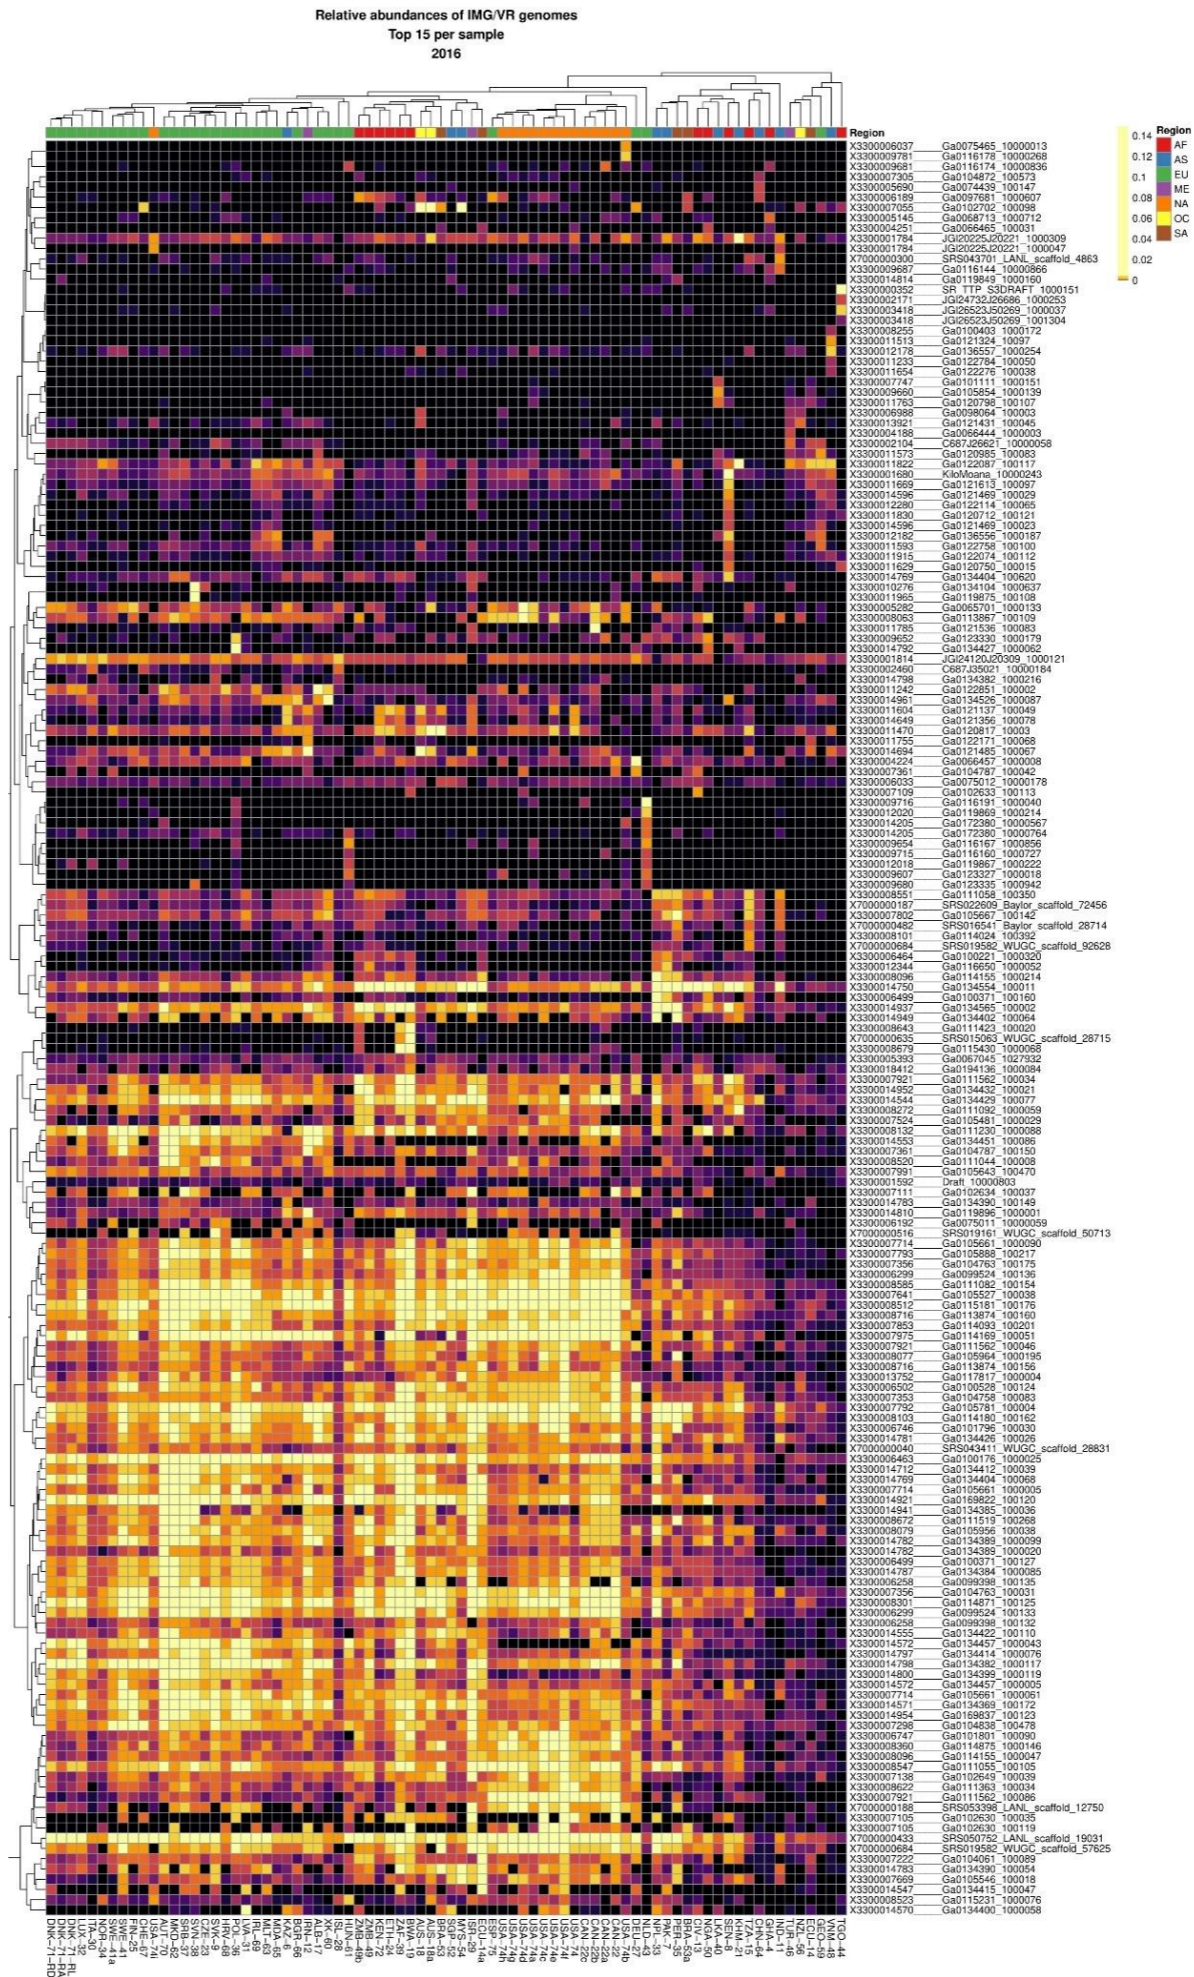



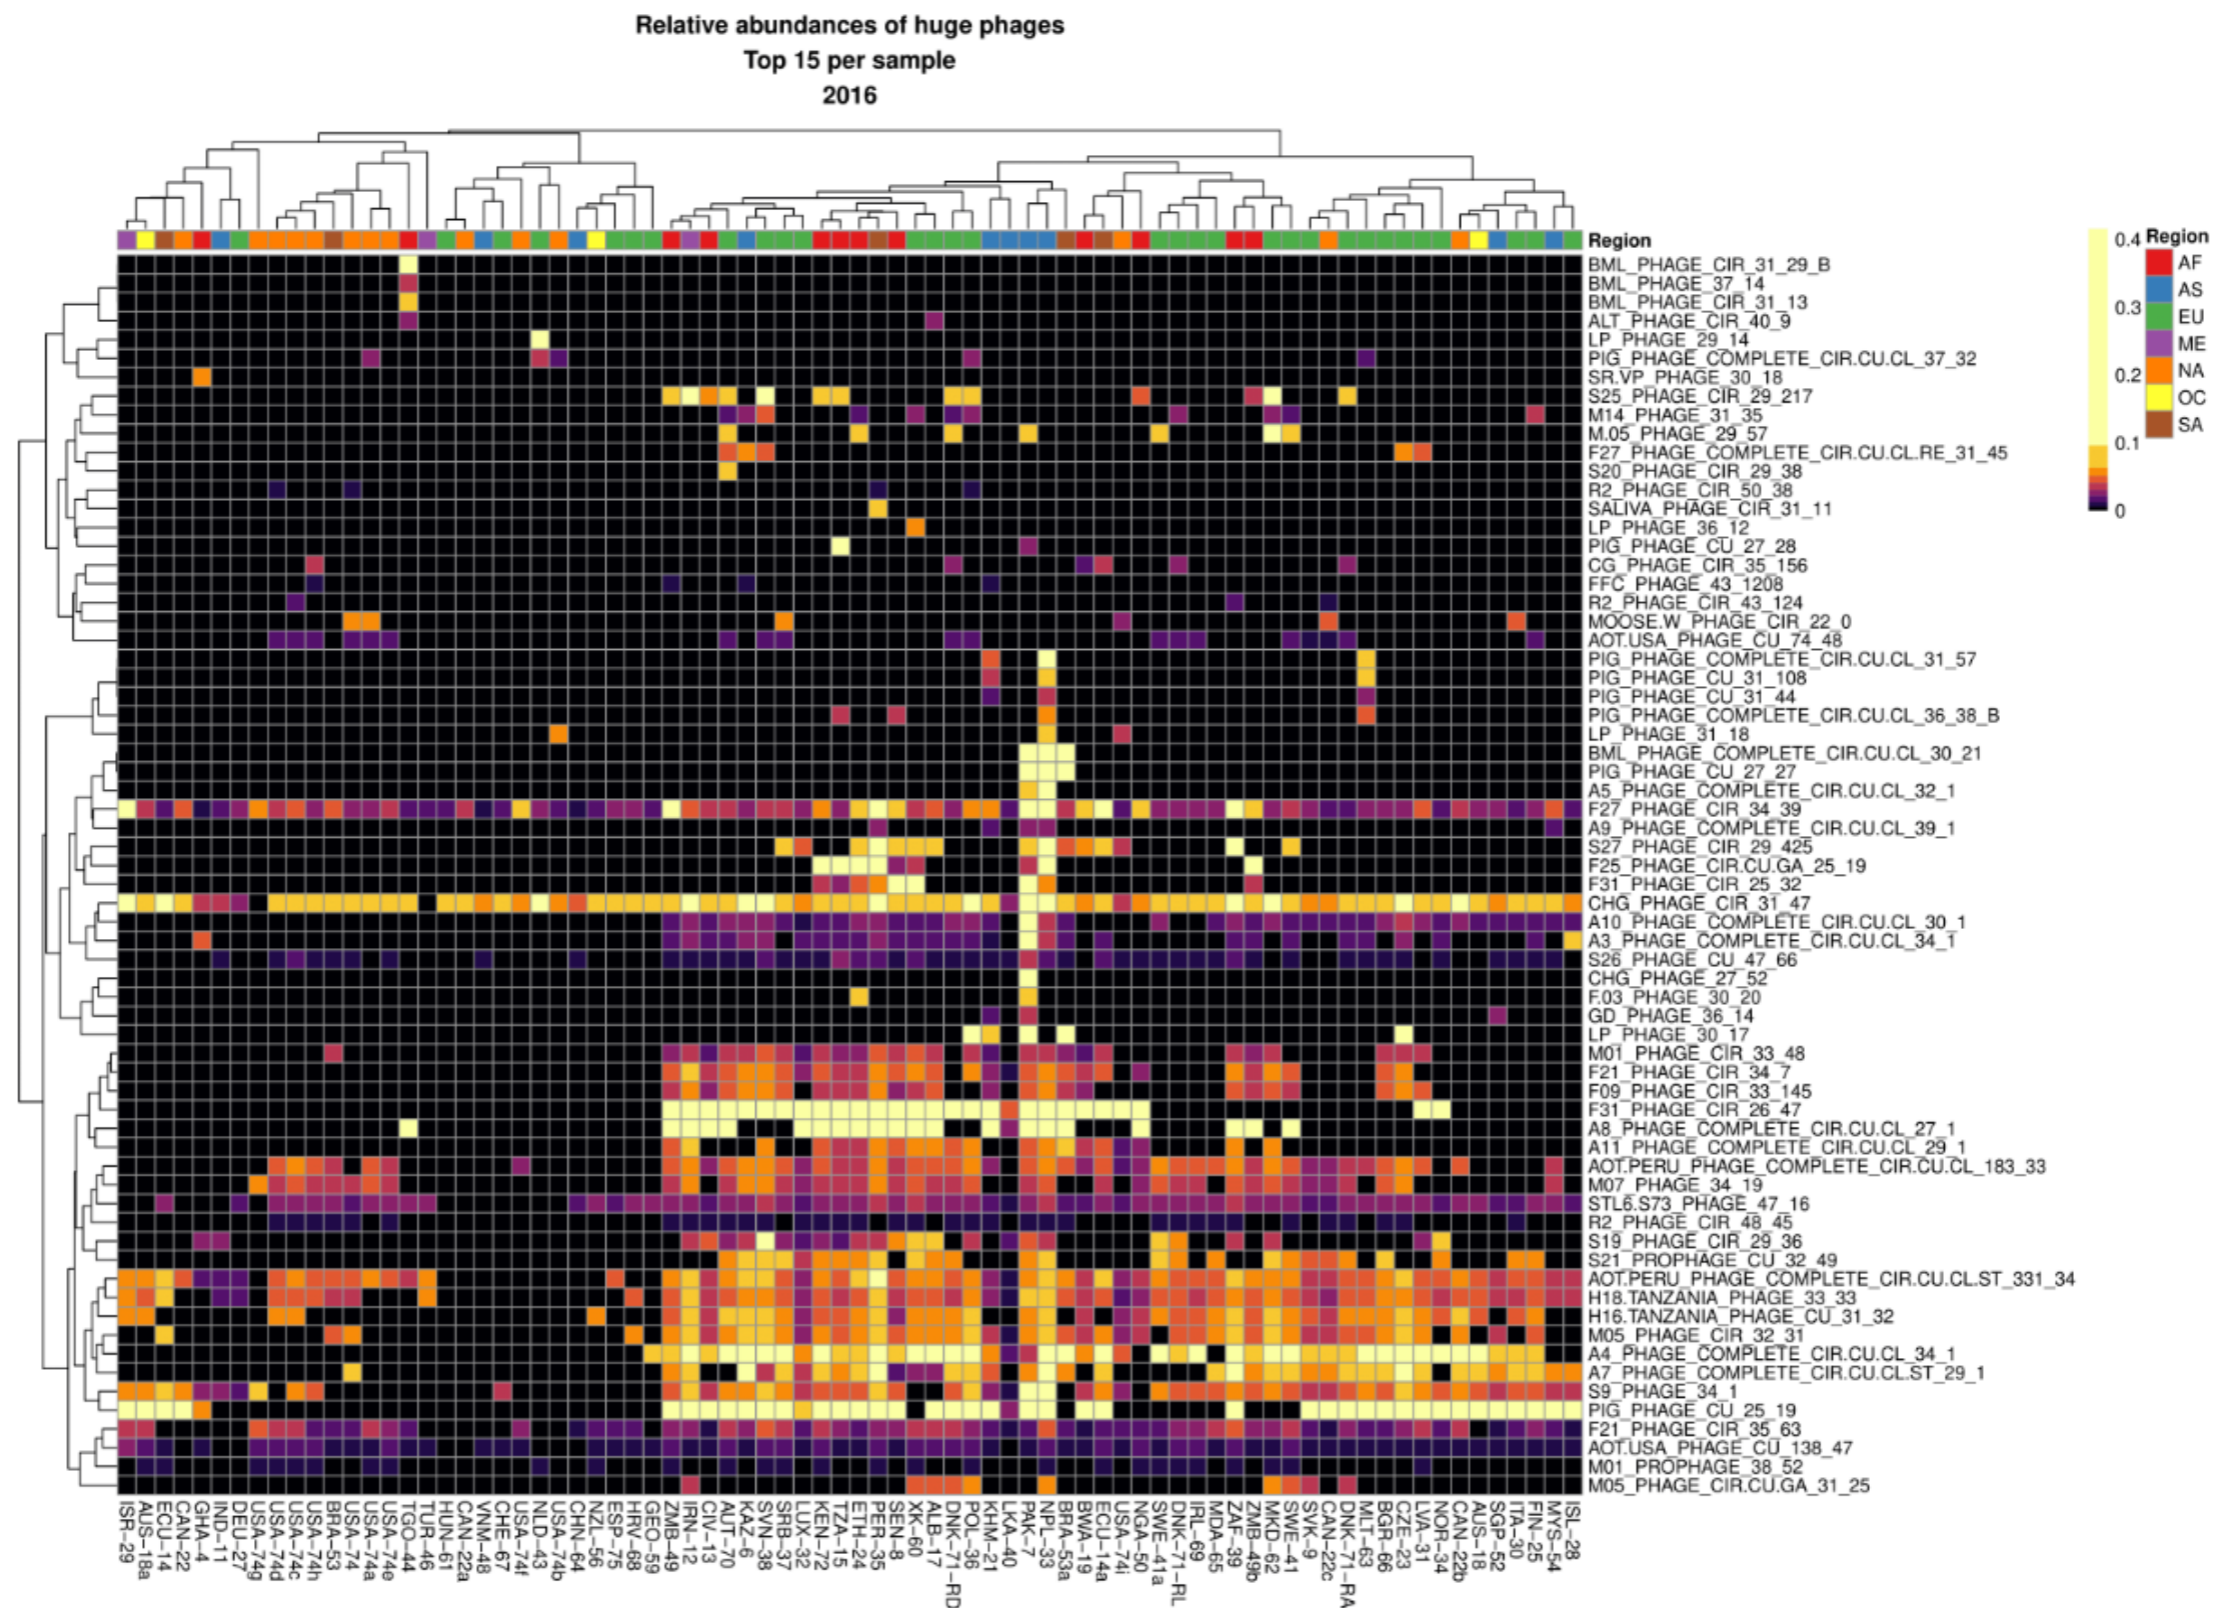

**Supplementary Figure 10 Relative abundances for top 15 of huge phages per sample.** 67 total phages. Colour intensity based on 3.3%-quantiles. Columns clustered according to Bray-Curtis dissimilarities of Hellinger standardised relative abundances. Rows hierarchically clustered according to Pearson correlation. AF, Africa; AS, Asia; EU, Europe; ME, Middle East; NA, North America; OC, Oceania; SA, South America.

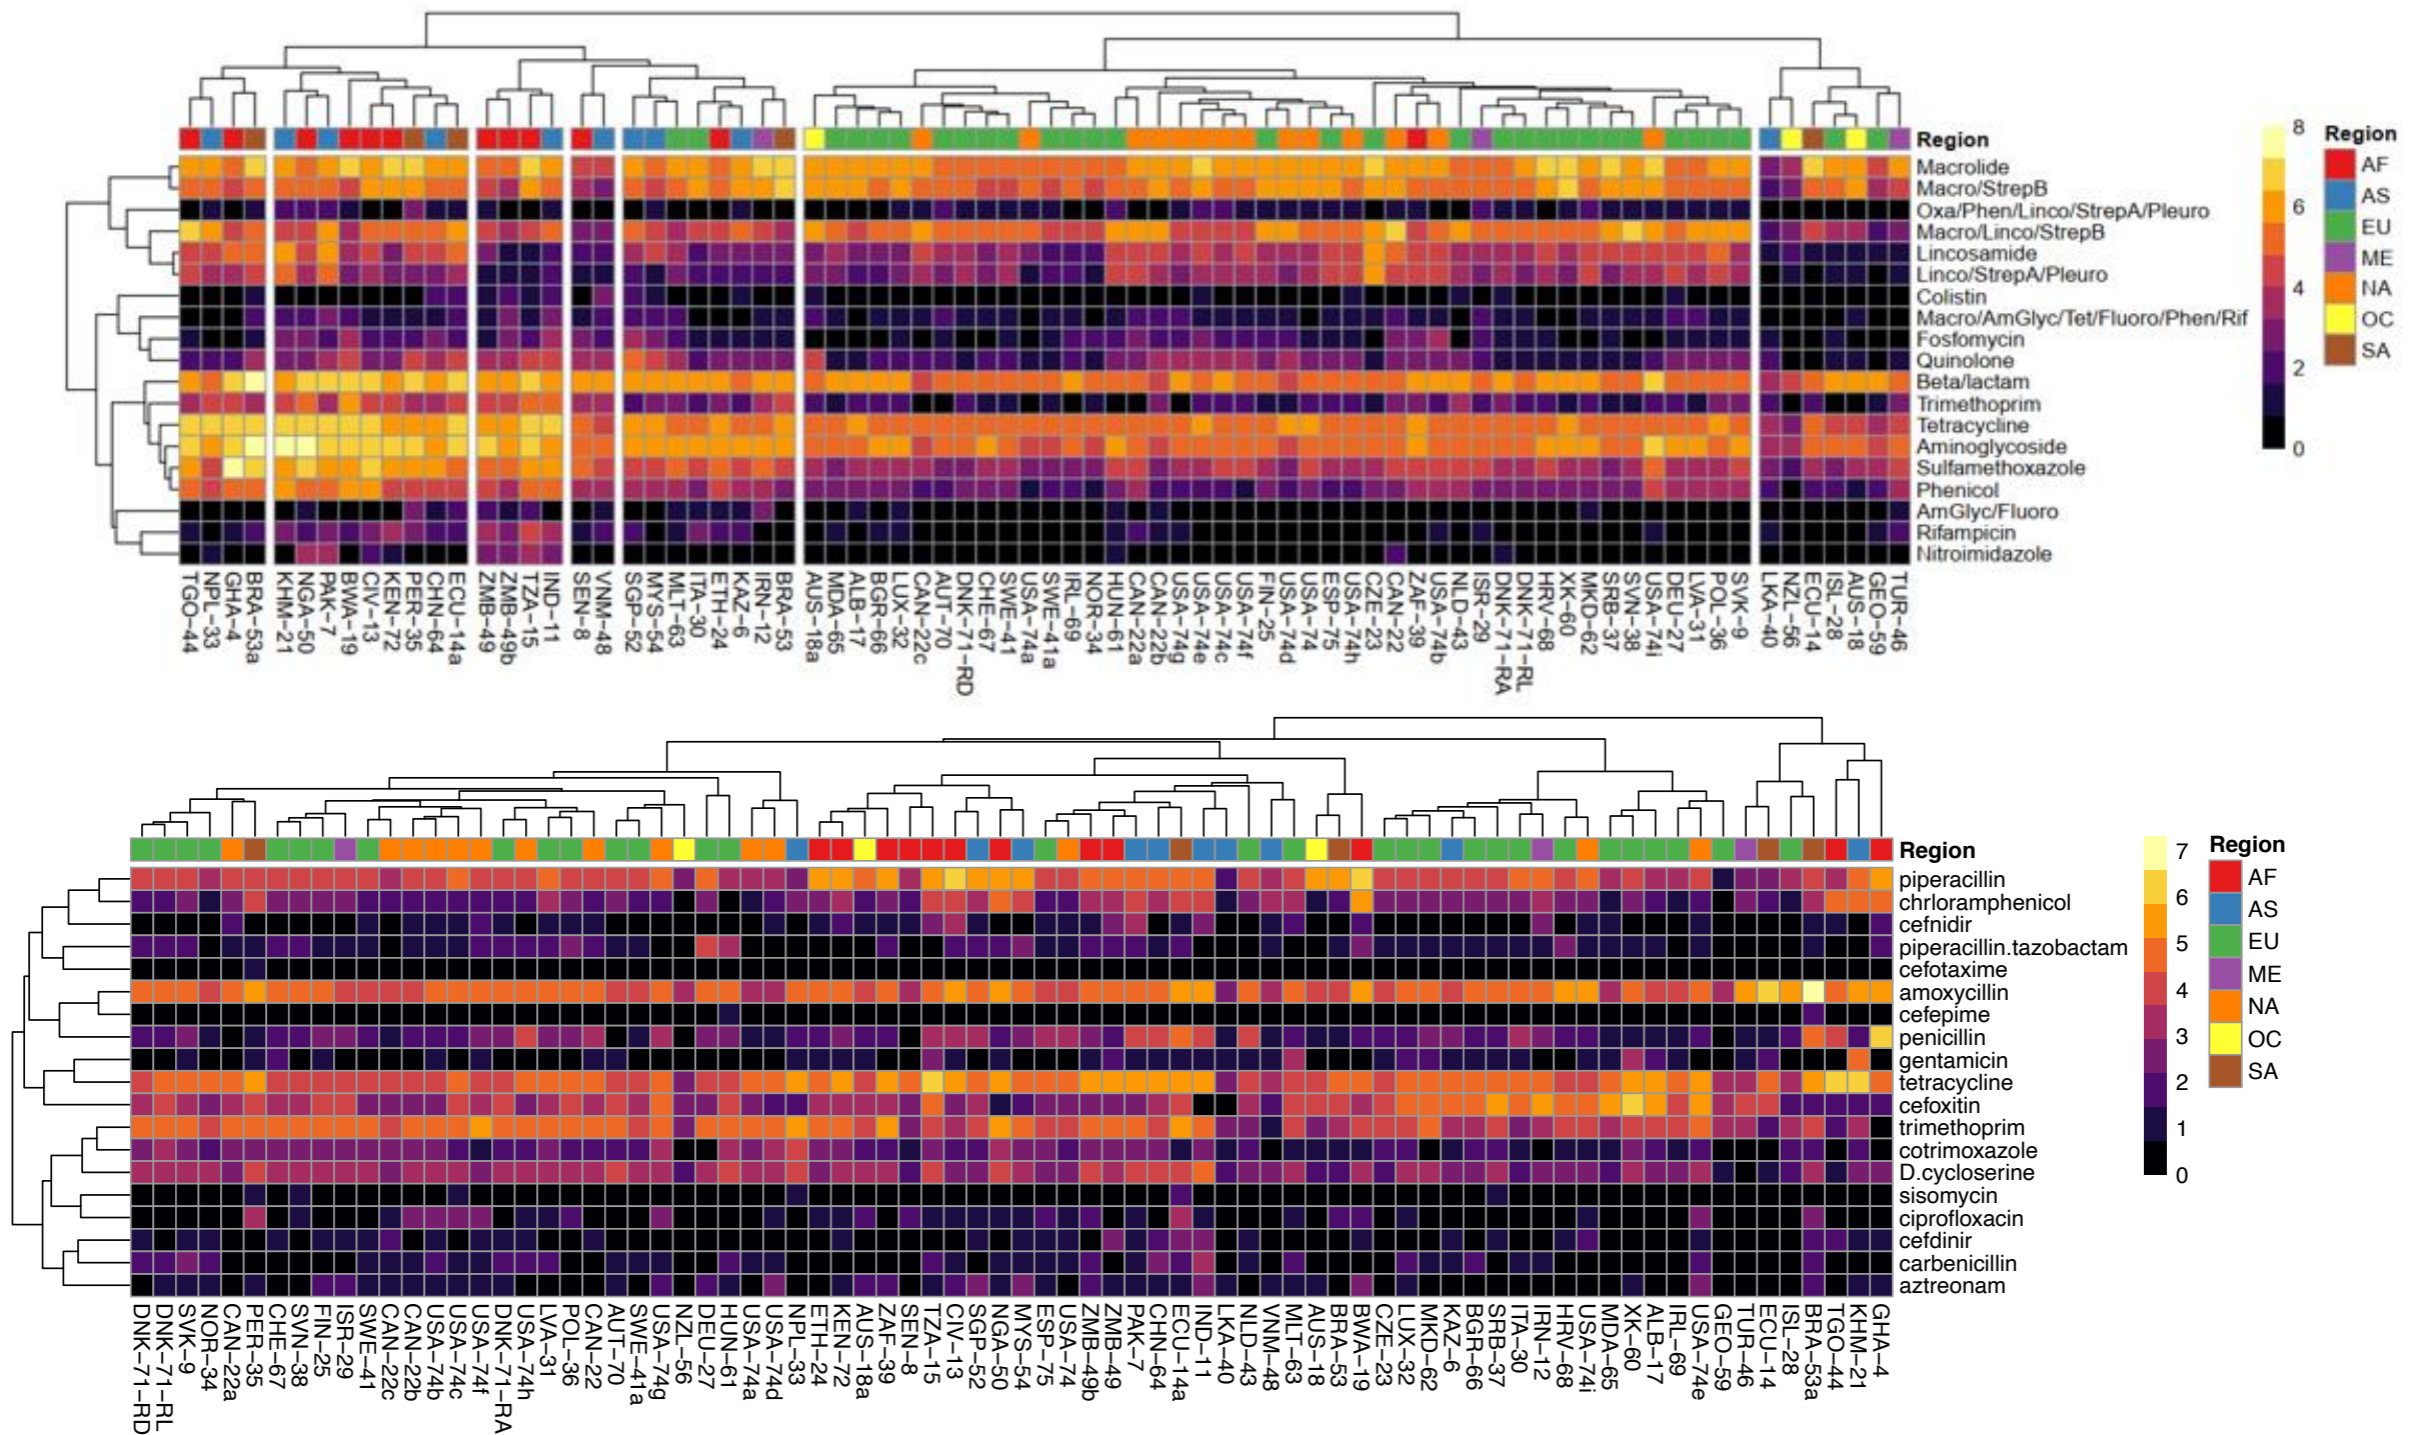

**Supplementary Figure 11** Log-transformed FPKM of ARGs identified from ResFinder (top) and Functional Resistance (bottom). Amino, Aminoglycoside; Fluoro, Fluoroquinolone; Linco, Lincosamide; Macro, Macrolide; Oxa. Oxazolidinone; Phen, Phenicol; Pleuro, Pleuromutilin; Rif, Rifampicin; StreptoA, Streptogramin A; StreptoB, Streptogramin B; Tet, Tetracycline. AF, Africa; AS, Asia; EU, Europe; ME, Middle East; NA, North America; OC, Oceania; SA, South America



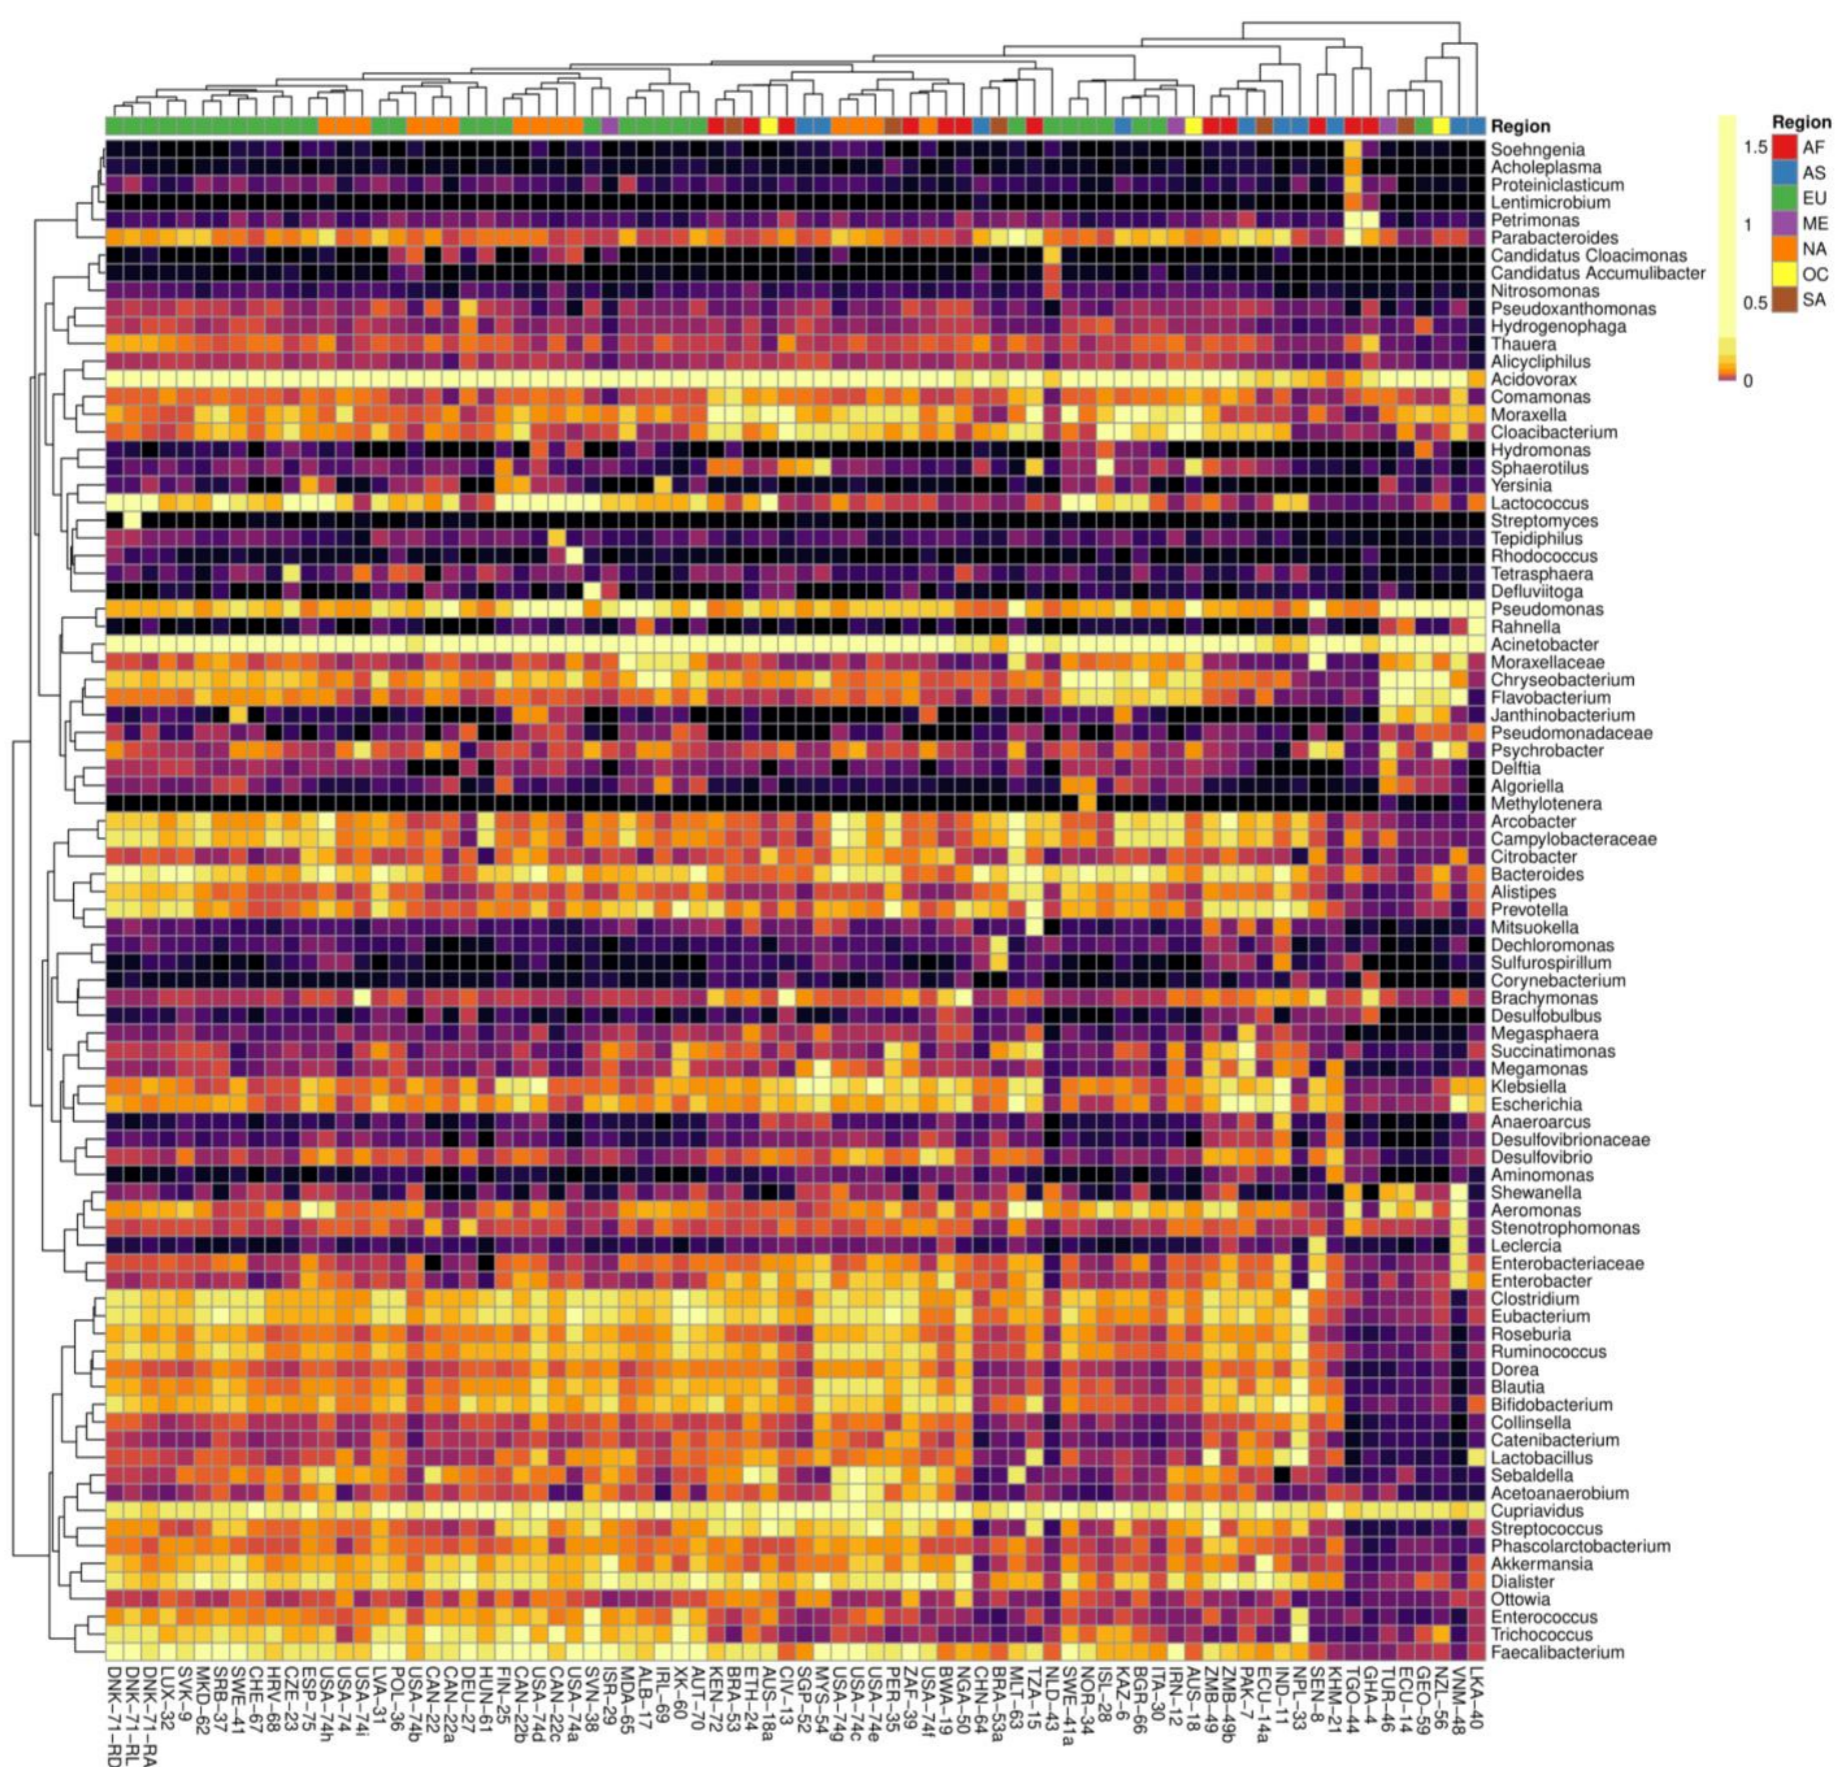

**Supplementary Figure 12** Relative abundances of top 15 NCBI bacterial genera. Intensities based on 10% quantiles. AF, Africa; AS, Asia; EU, Europe; ME, Middle East; NA, North America; OC, Oceania; SA, South America.
